# Supplementary material
Source: PubMed Central journal article supplement (PMC7482399)
Supplement: ic0c01979_si_001.pdf [file ic0c01979_si_001.pdf]

## Supporting Information

# Ligand-Mediated Spin-State Changes in a Cobalt-Dipyrrin-Bisphenol Complex

Nicolaas P. van Leest,<sup>a</sup> Wowa Stroek,<sup>a</sup> Maxime A. Siegler,<sup>b</sup> Jarl Ivar van der Vlugt<sup>a,c</sup> and Bas de Bruin<sup>\*a</sup>

<sup>a</sup> *Homogeneous, Supramolecular and Bio-Inspired Catalysis Group, van 't Hoff Institute for Molecular Sciences (HIMS), University of Amsterdam, Science Park 904, 1098 XH Amsterdam, The Netherlands. \* E-mail: b.debruin@uva.nl*

<sup>b</sup> *Department of Chemistry, John Hopkins University, Baltimore, Maryland 21218, United States.*

<sup>c</sup> *Bioinspired Coordination Chemistry & Homogeneous Catalysis Group, Institute of Chemistry, Carl von Ossietzky University Oldenburg, Carl-von-Ossietzky-Str. 9-11, 26129 Oldenburg, Germany.*

|                                                          |     |
|----------------------------------------------------------|-----|
| General considerations                                   | S2  |
| Synthesis and characterization                           | S7  |
| Complete Active Space Self Consistent Field Calculations | S22 |
| Density Functional Theory calculations                   | S28 |
| References in the Supporting Information                 | S41 |

## General considerations

### *Chemicals and solvents*

All reagents were of commercial grade and used without further purification, unless noted otherwise. All reactions were performed under an inert atmosphere in a N<sub>2</sub> filled glovebox or by using standard Schlenk techniques (under Ar or N<sub>2</sub>), unless noted otherwise. CH<sub>2</sub>Cl<sub>2</sub> and MeOH were distilled from CaH<sub>2</sub>, toluene was distilled from sodium, THF was distilled from sodium benzophenone ketyl.

### *NMR spectroscopy*

<sup>1</sup>H, <sup>13</sup>C, <sup>19</sup>F and <sup>31</sup>P NMR spectra were recorded on a Bruker DRX 500, Bruker AMX 400, Bruker DRX 300 or Varian Mercury 300 spectrometer at room temperature, unless noted otherwise.

### *Mass spectrometry*

ESI mass spectra were collected on an AccuTOF LC, JMS-T100LP Mass spectrometer (JEOL, Japan). The ESI apparatus features a liquid nitrogen cooling device to maintain the temperature of the capillary and spray itself between 0 °C and –50 °C. Typical measurement conditions are as follows: Positive-ion mode; Needle voltage 2000V, Orifice 1 voltage 90V, Orifice 2 voltage 9V, Ring Lens voltage 22V. Orifice 300C, Desolvating Chamber 30 °C, spray temperature –40 °C. FD Mass spectra were collected on an AccuTOF GC v 4g, JMS-T100GCV Mass spectrometer (JEOL, Japan). FD/FI probe (FD/FI) equipped with FD Emitter, Carbotec or Linden (Germany), FD 13 μm. Current rate 51.2 mA/min over 1.2 min. FI Emitter, Carbotec or Linden (Germany), FI 10 μm. Flashing current 40 mA on every spectra of 30 ms. Typical measurement conditions are: Counter electrode –10kV, Ion source 37V.

### *UV-Vis spectroscopy*

UV-Vis spectra were recorded on a Hewlett Packard 8453 or a double beam Shimadzu UV-2600 spectrometer in a 1.0 cm quartz cuvette.

### *Elemental Analysis*

Was performed by Mikroanalytisches Laboratorium Kolbe (Oberhausen, Germany).

### *SQUID*

Measured with a SQUID susceptometer (Quantum Design) 7T, 4K - 290K range and acquisition software MultiVu.

### *Single Crystal X-ray Crystallography*

For [Co<sup>II</sup>(DPP<sup>2-</sup>)] and [Co<sup>III</sup>(DPP<sup>3-</sup>)(NH<sub>2</sub>Ad)<sub>2</sub>]: X-ray intensities were measured on a Bruker D8 Quest Eco diffractometer equipped with a Triumph monochromator ( $\lambda = 0.71073 \text{ \AA}$ ) and a CMOS Photon 100 detector at a temperature of 150(2) K. Intensity data were integrated with the Bruker APEX2 software.<sup>1</sup> Absorption correction and scaling was performed with SADABS.<sup>2</sup> The structures were solved using intrinsic phasing with the program SHELXT.<sup>3</sup> Least-squares refinement was performed with SHELXL-2013<sup>4</sup> against F<sup>2</sup> of all reflections. Non-hydrogen atoms were refined with anisotropic displacement parameters. The H atoms were

placed at calculated positions using the instructions AFIX 13, AFIX 43 or AFIX 137 with isotropic displacement parameters having values 1.2 or 1.5 times  $U_{eq}$  of the attached C atoms.

For **DPPH<sub>3</sub>**, [**Co<sup>III</sup>(DPP<sup>3-</sup>)(Py)<sub>2</sub>**] and [**Co<sup>III</sup>(DPP<sup>3-</sup>)(NH<sub>2</sub>tBu)<sub>2</sub>**]: all reflection intensities were measured at 110(2) K using a SuperNova diffractometer (equipped with Atlas detector) with Cu  $K\alpha$  radiation ( $\lambda = 1.54178$  Å) under the program CrysAlisPro (Version CrysAlisPro 1.171.39.29c, Rigaku OD, 2017). The same program was used to refine the cell dimensions and for data reduction. The structures were solved with the program SHELXS-2018/3 (Sheldrick, 2018) and were refined on  $F^2$  with SHELXL-2018/3 (Sheldrick, 2018). Analytical numeric absorption correction using a multifaceted crystal model was applied using CrysAlisPro. The temperature of the data collection was controlled using the system Cryojet (manufactured by Oxford Instruments). The H atoms were placed at calculated positions (unless otherwise specified) using the instructions AFIX 43, AFIX 137 or AFIX 147 with isotropic displacement parameters having values 1.2 or 1.5  $U_{eq}$  of the attached C or O atoms. Crystal structures were visualized with the Mercury software package.<sup>5</sup>

Accession codes:

CCDC 2012086 (**DPPH<sub>3</sub>**), 2012087 ([**Co<sup>II</sup>(DPP<sup>2-</sup>)**]), 2012088 ([**Co<sup>III</sup>(DPP<sup>3-</sup>)(Py)<sub>2</sub>**]), 2012089 ([**Co<sup>III</sup>(DPP<sup>3-</sup>)(NH<sub>2</sub>tBu)<sub>2</sub>**]) and 2012090 ([**Co<sup>III</sup>(DPP<sup>3-</sup>)(NH<sub>2</sub>Ad)<sub>2</sub>**]) contain the supplementary crystallographic data and can be obtained free of charge via <http://www.ccdc.cam.ac.uk/structures/>.

Additional refinement details:

**DPPH<sub>3</sub>**: The structure is mostly ordered. The H atoms attached to N1, N2, O1 and O2 were found from difference Fourier maps, and the coordinates were refined pseudofreely using the DFIX instruction in order to keep the N–H and O–H distances within some acceptable ranges. The disordered sets of H atoms (H1N1, H1O1, H1O2) and (H2N2, H2O1, H2O2) occur with equal probability. If N1 is protonated, then the H atom attached to O1 points away from N1, and the H atom attached to O2 points toward N2. If N2 is protonated, then the H atom attached to O2 points away from N2, and the H atom attached to O1 points toward N1.

[**Co<sup>III</sup>(DPP<sup>3-</sup>)(Py)<sub>2</sub>**]: The asymmetric unit contains three crystallographically independent molecules of the target compound (labelled A, B and C). The structure is partly disordered. One  $-C_6F_5$  group and one *t*-butyl group are found to be disordered over two orientations, and the occupancy factors of the major components of the disorder refine to 0.781(8) and 0.553(7), respectively. The asymmetric unit also contains some amount of lattice solvent molecules that are very disordered and most likely partially occupied. Their contribution has been removed using the SQUEEZE procedure in Platon.<sup>6</sup>

[**Co<sup>III</sup>(DPP<sup>3-</sup>)(NH<sub>2</sub>tBu)<sub>2</sub>**]: The asymmetric unit contains three crystallographically independent molecules of the target compound (labelled A, B and C). The H atoms attached to N3X and N4X (X = A, B and C) were found from difference Fourier maps, and their coordinates were refined pseudofreely using the DFIX instruction in order to keep the N–H distances within an acceptable range. The structure is mostly ordered. The structure contains some small amount of very disordered and/or partially occupied MeOH solvent

molecules. In the final refinement, their contribution has been removed using the SQUEEZE procedure in Platon (Spek, 2009).

#### *EPR spectroscopy*

EPR spectra were recorded on a Bruker EMX X-band spectrometer equipped with a He cryostat. The spectra were analyzed and simulated using the W95EPR program of Prof. F. Neese (MPI Mülheim a/d Ruhr).

#### *Magnetic moment measurements using Evans' method*

Magnetic moments were determined according to reported procedures by solvation of a known amount of the analyte in a known amount of deuterated solvent with an internal standard in an NMR tube.<sup>7</sup> A capillary containing the deuterated solvent and internal standard was inserted in the NMR tube and a <sup>1</sup>H NMR spectrum was recorded. The mass susceptibility ( $\chi$  in cm<sup>3</sup>g<sup>-1</sup>) of the analyte was calculated with equation (1), wherein  $\nu_0$  is the operating frequency of the NMR spectrometer (Hz) and  $c$  is the concentration of the analyte in the solution (g L<sup>-1</sup>). The molar susceptibility ( $\chi_M$  in cm<sup>3</sup>mol<sup>-1</sup>) can be calculated by equation (2), wherein  $M$  is the molar mass of the analyte.  $\chi_M^P$  is the pure paramagnetic molar susceptibility and can be calculated by equation (3) in which  $\chi_M^{Dia}$  (the diamagnetic molar susceptibility) is a correction on  $\chi_M$  to account for the diamagnetic contributions within the analyte. The diamagnetic molar susceptibility ( $\chi_M^{Dia}$ ) can be calculated by using Pascal's constants, or estimated from the molecular mass.<sup>7</sup> With equation (4),  $\chi_M^P$  can be used to calculate the effective magnetic moment ( $\mu_{eff}$ ) of the analyte, in which  $k$  is the Boltzmann constant,  $T$  is the temperature in Kelvin,  $N_A$  is the Avogadro constant and  $\mu_B$  is the Bohr magneton. The electron spin quantum number ( $S$ ) can now be calculated with equation (5) from the effective magnetic moment by solving for  $S$ . Here,  $g$  is obtained from an EPR measurement or taken as the  $g_e$ -value for the free electron (2.0023).

$$(1) \chi = \frac{3000 \times \Delta\nu}{4\pi \times \nu_0 \times c}$$

$$(2) \chi_M = \chi \times M$$

$$(3) \chi_M^P = \chi_M - \chi_M^{Dia}$$

$$(4) \mu_{eff} = \sqrt{\frac{3 \times k \times T \times \chi_M^P}{N_A \times \mu_B^2}} \approx 2.82787 \sqrt{T \times \chi_M^P}$$

$$(5) \mu_{eff} = g \sqrt{S(S+1)}$$

### *DFT calculations*

DFT studies were performed on full atomic models (no simplifications) using TURBOMOLE 7.3<sup>8</sup> coupled to the PQS Baker optimizer<sup>9</sup> via the BOpt package.<sup>10</sup> We chose this software package for the DFT calculations because it is fast and we have good experience (i.e. relatively fast convergence) with this combination of software for comparable cobalt complexes.<sup>11</sup> The geometry optimizations and frequency analysis was performed at the B3LYP<sup>12</sup>/def2-SVP<sup>13</sup> level of theory (unless noted otherwise) on an m4 grid, using Grimme's version 3 (disp3, "zero damping") dispersion corrections.<sup>14</sup> All minima (no imaginary frequencies) were characterized by numerically calculating the Hessian matrix. Final orbital and energy evaluation was performed at the B3LYP<sup>12</sup>/def2-TZVP<sup>15</sup> level of theory (unless noted otherwise) on an m4 grid, using Grimme's version 3 (disp3, "zero damping") dispersion corrections,<sup>16</sup> on the optimized geometries. Energy output was reported in Hartree and was converted to kcal mol<sup>-1</sup> by multiplication with 627.503.

When applicable, corrected broken symmetry energies  $\epsilon_{BS}$  of the open-shell singlets ( $S = 0$ ) were estimated from the energy ( $\epsilon_S$ ) of the optimized single-determinant broken symmetry solution and the energy ( $\epsilon_{S+1}$ ) from a separate unrestricted triplet single-point calculation at the same level, using the approximate correction formula (6).<sup>10</sup>

$$(6) \quad \epsilon \approx \frac{S_{S+1}^2 \times \epsilon_S - S_S^2 \times \epsilon_{S+1}}{S_{S+1}^2 - S_S^2}$$

Orbital interpretation was done by Löwdin population analysis of quasi restricted orbitals (QRO) generated with the ORCA 4.1<sup>17</sup> software package at the B3LYP<sup>12</sup>/TZVP<sup>13</sup> level, using the coordinates from the structures optimized in TURBOMOLE as the input and using the UNO keyword.

Graphical representations of orbitals were generated using IboView<sup>18</sup> and structures were visualized with Chimera (available at <http://www.cgl.ucsf.edu/chimera>).

### *NEVPT2-CASSCF calculation*

The NEVPT2 corrected CASSCF calculations were performed with the ORCA 4.1<sup>17</sup> software package on the geometry optimized in TURBOMOLE at the experimentally found spin state. This approach has been used in our group before<sup>11</sup> and the implementation of NEVPT2-CASSCF in ORCA is relatively straightforward (see <https://orcaforum.kofo.mpg.de/> for manuals), therefore justifying our choice for the ORCA software package. The def2-TZVP<sup>13</sup> basis set was used together with the RIJCOSX<sup>19</sup> approximation in conjunction with the def2-TZVP/C fitting basis set to reduce computational cost. The single root spin state was calculated. NEVPT2<sup>20</sup> calculations using the RI approximation were carried out on converged CASSCF wavefunctions. Canonical orbitals were generated for visualization using IboView.<sup>18</sup> Energy output was reported in Hartree and was converted to kcal mol<sup>-1</sup> by multiplication with 627.503.

A general flow-scheme for the calculation is described below, including the input for the calculation in brackets:

1. The molecule was aligned properly along the x, y and z axis and QRO-type orbitals were generated in a single-point calculation by usage of the UNO keyword.  
[!BP86 def2-TZVP def2-TZVP/C RIJCOSX UNO Normalprint KeepDens]
2. The QRO orbitals were used for a restricted open-shell Kohn-Sham (ROKS) calculation.  
[! ROKS BP86 def2-TZVP def2-TZVP/C RIJCOSX Normalprint noiter MOREAD]

- ```
%moinp "orbitals.qro"]
```
- Löwdin population analysis and visualization using IboView were used to identify the orbitals of interest (all metal d orbitals, relevant ligand  $\pi$  orbitals and relevant metal-ligand bonding and antibonding orbitals) and rotate these into the active space.

```
[! ROKS BP86 def2-TZVP def2-TZVP/C RIJCOSX Normalprint noiter MOREAD
%moinp "orbitals.gbw"]
%scf rotate {orbital number, active space location} end end]
```
  - The single root CASSCF calculation was performed.

```
[! def2-TZVP def2-TZVP/C RIJCOSX Normalprint MOREAD
%moinp "orbitals.gbw"
%casscf
trafostep ri
nel (number of active electrons)
norb (number of active orbitals)
mult (multiplicity)
end]
```
  - The converged CASSCF calculation was analyzed for convergence and preservation of the active space. The NEVPT2 correction was then applied and the orbitals were transformed to canonical orbitals for final visualization and (total) energy evaluation.

```
[! def2-TZVP def2-TZVP/C RIJCOSX Normalprint MOREAD RI-NEVPT2
%moinp "orbitals.gbw"
%casscf
trafostep ri
nel (number of active electrons)
norb (number of active orbitals)
mult (multiplicity)
actorbs canonorbs
intorbs canonorbs
extorbs canonorbs
nevpt
d4step fly
end
end]
```

## Synthesis and characterization

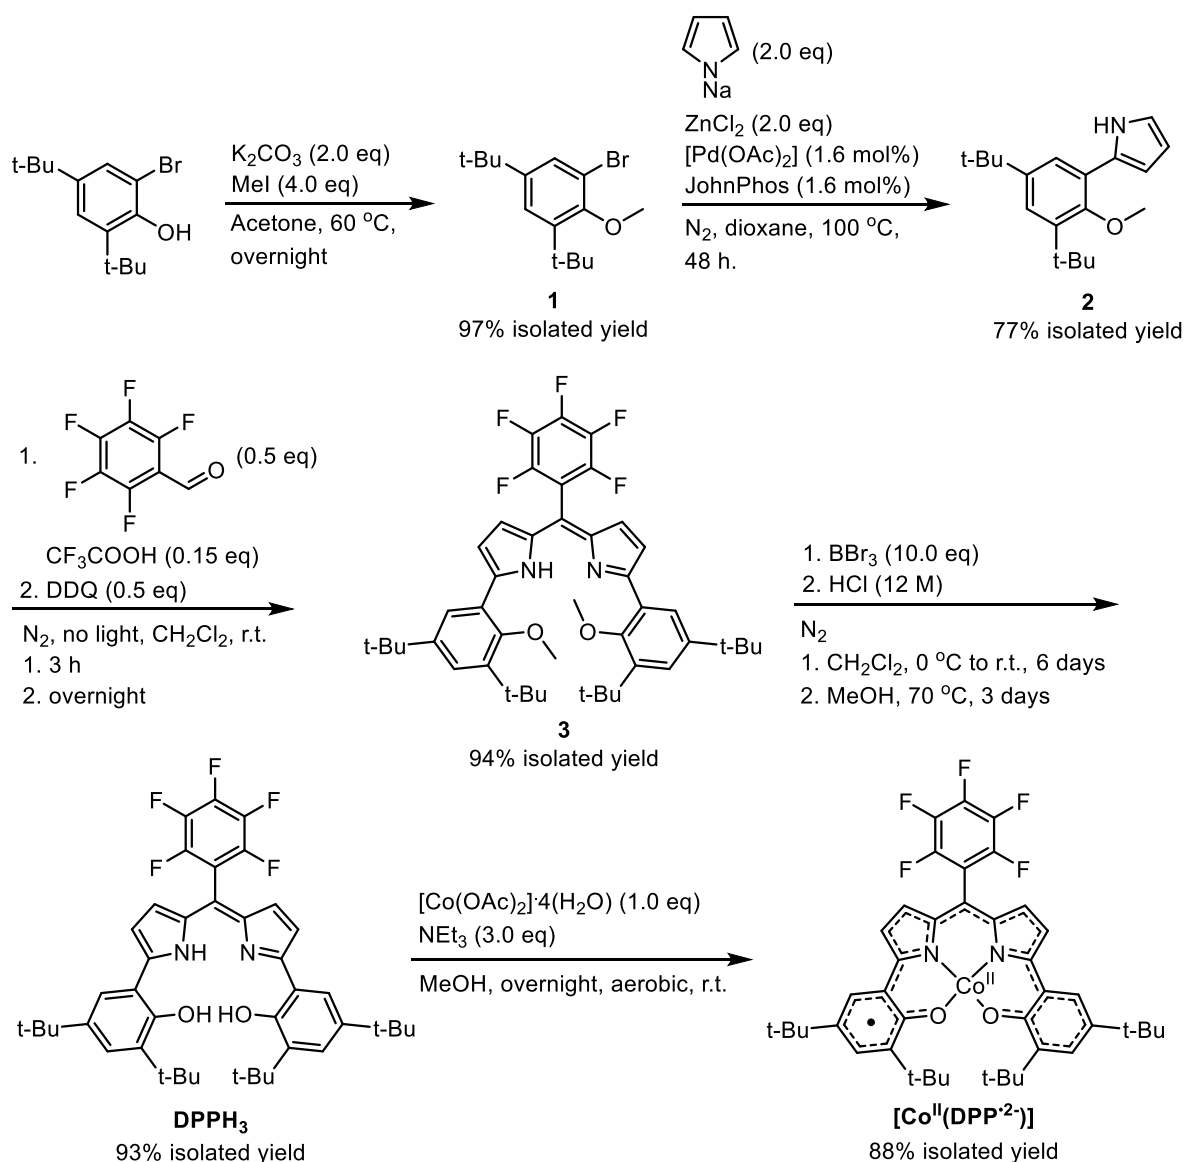

**Scheme S1.** Synthesis of **DPPH<sub>3</sub>** and **[Co<sup>II</sup>(DPP<sup>2-</sup>)]**.

Pyrrolysodium,<sup>21</sup> **1**,<sup>22</sup> and **2**<sup>23</sup> were prepared according to literature procedures, and the spectral data were found to match the reported spectra (see Scheme S1).

**3**: Adapted from a literature procedure for the condensation reaction.<sup>23</sup> 2-(3,5-di-*tert*-butyl-2-methoxyphenyl)-1*H*-pyrrole (**2**, 4.00 g; 14.0 mmol; 1.0 eq) was dissolved in  $\text{CH}_2\text{Cl}_2$  (50 mL) under the exclusion of light in a flame dried Schlenk under a nitrogen atmosphere. Pentafluorobenzaldehyde (0.87 mL; 7.0 mmol; 0.5 eq) and trifluoroacetic acid (0.16 mL; 2.1 mmol; 0.15 eq) were added sequential and the mixture was stirred for 3 hours at r.t. to yield a blue solution. DDQ (2,3-dichloro-5,6-dicyano-1,4-benzoquinone, 1.59 g; 7.0 mmol; 0.5 eq) was added, yielding a purple solution and stirred at r.t. overnight. The purple solution was washed three times with saturated aqueous  $\text{NaHCO}_3$  (30 mL). The organic layer was further purified by filtration over silica using hexane/ $\text{CH}_2\text{Cl}_2$  (9:1) as the eluent. The product was obtained as an orange powder in 4.91 g; 6.6 mmol; 94% yield.

$^1\text{H}$  NMR (300 MHz, Methylene Chloride- $d_2$ )  $\delta$  7.55 (d,  $J = 2.5$  Hz, 2H), 7.41 (d,  $J = 2.5$  Hz, 2H), 6.84 (d,  $J = 4.3$  Hz, 2H), 6.53 (d,  $J = 4.3$  Hz, 2H), 3.64 (s, 6H), 1.43 (s, 18H), 1.33 (s, 18H).

$^{19}\text{F}$  NMR (282 MHz, Methylene Chloride- $d_2$ )  $\delta$  -137.79 – -141.33 (m), -154.07 (t,  $J = 21.0$  Hz), -160.32 – -164.08 (m).

$^{13}\text{C}$  NMR (75 MHz, Chloroform- $d$ )  $\delta$  156.30, 155.78, 145.59, 142.27, 140.77, 126.73, 126.43, 125.47, 125.06, 120.27, 120.17, 61.93, 35.39, 34.58, 31.56, 31.04. All four  $^{13}\text{C}$  resonances corresponding to the  $\text{C}_6\text{F}_5$  fragment are absent due to broadening of the signal as a result of coupling with  $^{19}\text{F}$ . Similar signal loss in DPP-derived ligands was reported in literature.<sup>24</sup> Similar loss of signal intensity was observed in  $^{13}\text{C}$  NMR analysis of a highly concentrated pentafluorobenzaldehyde solution. Which gave relative peak intensities of 1 ( $^{13}\text{C}=\text{O}$ ) : 0.78 ( $^{13}\text{C}-\text{F}$ ) : 0.13 ( $^{13}\text{C}-\text{F}$ ) : 0.82 ( $^{13}\text{C}-\text{F}$ ) : 0.33 ( $^{13}\text{C}-\text{C}=\text{O}$ ).

HRMS-FD<sup>+</sup>: calc. for  $[\text{C}_{45}\text{H}_{51}\text{F}_5\text{N}_2\text{O}_2]^+$ : 746.3871, found: 746.3899  $[\text{M}]^+$ .

**DPPH<sub>3</sub>**: Adapted from a literature procedure for the deprotection reaction.<sup>23</sup> **3** (0.400 g; 0.54 mmol; 1.0 eq) was dissolved in  $\text{CH}_2\text{Cl}_2$  (20 mL) and cooled to 0 °C in a flame dried Schlenk under a nitrogen atmosphere compound.  $\text{BBr}_3$  (0.52 mL; 5.4 mmol; 10 eq) was added dropwise to give a blue solution that was stirred while warming to r.t. and stirred for 6 more days. MeOH (30 ml) was added slowly to quench the unreacted  $\text{BBr}_3$ . The blue mixture was concentrated and dissolved in MeOH (50 mL), 30 mL concentrated  $\text{HCl}_{(\text{aq})}$  solution was added and the mixture was refluxed at 70 °C for 3 days. The reaction mixture was neutralized with a saturated aqueous  $\text{NaHCO}_3$  solution (100 mL). The obtained pink suspension was extracted with EtOAc (100 mL), washed with brine (100 mL), dried over  $\text{Na}_2\text{SO}_4$ , filtered and the filtrate was concentrated. The crude product was purified by filtration over silica using hexane as eluent. The product was obtained as pink crystalline powder in 0.356 g; 0.50 mmol; 93% yield. In order to speed up the reaction, it is advised to perform the work up each day and start the reaction again until full conversion is reached.

$^1\text{H}$  NMR (300 MHz, Methylene Chloride- $d_2$ )  $\delta$  7.61 (d,  $J = 2.4$  Hz, 2H), 7.41 (d,  $J = 2.4$  Hz, 2H), 7.03 (d,  $J = 4.5$  Hz, 2H), 6.56 (d,  $J = 4.5$  Hz, 2H), 1.54 (s, 18H), 1.35 (s, 18H).

$^{19}\text{F}$  NMR (282 MHz, Methylene Chloride- $d_2$ )  $\delta$  -139.84 (m), -153.77 (t,  $J = 20.9$  Hz), -162.00 (m).

$^{13}\text{C}$  NMR (75 MHz, Methylene Chloride- $d_2$ )  $\delta$  153.69, 142.90, 139.54, 136.51, 128.61, 126.78, 123.87, 120.17, 118.39, 118.08, 35.36, 34.87, 31.79, 30.66. Five  $^{13}\text{C}$  NMR signal are missing for the reasons as explained in the characterization of **3** (*vide supra*).

HRMS-FD<sup>+</sup>: calc. for  $[\text{C}_{43}\text{H}_{47}\text{F}_5\text{N}_2\text{O}_2]^+$ : 718.3558, found: 718.3559  $[\text{M}]^+$ .

Elemental analysis: calc. for  $\text{C}_{43}\text{H}_{47}\text{F}_5\text{N}_2\text{O}_2$ : C 71.85; H 6.59; F 13.21; N 3.90; O 4.45; found: C 71.95; H 6.63; F 13.14; N 3.87; O 4.29.

XRD: XRD quality single crystals were grown by slow evaporation of a concentrated solution in  $\text{CH}_2\text{Cl}_2$  at room temperature. The 50% thermal ellipsoid probability plot is included in the main text, and the relevant bond lengths and atom numbering are depicted in Table S1. **DPPH<sub>3</sub>**,  $\text{C}_{43}\text{H}_{47}\text{F}_5\text{N}_2\text{O}_2$ , FW = 718.82, pink-purple plate, 0.29 mm  $\times$  0.14 mm  $\times$  0.05 mm, monoclinic,  $P2_1/c$ ,  $a = 21.9848(4)$  Å,  $b = 15.9671(3)$  Å,  $c = 10.8173(2)$  Å,  $\beta = 96.9017(18)^\circ$ ,  $V = 3769.72(12)$  Å<sup>3</sup>,  $Z = 4$ ,  $\mu = 0.78$  mm<sup>-1</sup>; 25014 reflections were measured with  $(\sin \theta/\lambda)_{\text{max}} = 0.616$  Å<sup>-1</sup>. 7407 Reflections were unique ( $R_{\text{int}} = 0.034$ ) of which 5443 were observed [ $I > 2\sigma(I)$ ]. Residual electron density between -0.23 and 0.61 e<sup>-</sup>/Å<sup>3</sup>.  $S = 1.041$ . Refinement:  $R[F^2 > 2\sigma(F^2)] = 0.043$ ,  $wR(F^2) = 0.124$ , number of reflections: 7407, number of parameters: 501, number of restraints: 10.



**[Co<sup>II</sup>(DPP<sup>2-</sup>)]**: Adapted from a literature procedure for the insertion of cobalt into the ligand.<sup>25</sup> **DPPH<sub>3</sub>** (1.00 g; 1.39 mmol; 1.0 eq) and [Co(OAc)<sub>2</sub>]-4H<sub>2</sub>O (0.347 g; 1.39 mmol; 1.0 eq) were dissolved in MeOH (50 mL) to afford a purple solution. Triethylamine (0.582 mL; 4.18 mmol; 3.0 eq) was added and the mixture was stirred at r.t. overnight under aerobic conditions. The obtained green suspension was concentrated, extracted with CH<sub>2</sub>Cl<sub>2</sub> and concentrated yielding a purple powder, which was washed with MeOH (50 mL) and dried. The product was obtained as a purple powder in 0.954 g; 1.23 mmol; 88% yield.

<sup>1</sup>H NMR (300 MHz, Methylene Chloride-*d*<sub>2</sub>) δ 12.82 (d, *J* = 5.1 Hz, 2H), 8.58 (d, *J* = 2.3 Hz, 2H), 7.78 (d, *J* = 5.1 Hz, 2H), 6.96 (d, *J* = 2.3 Hz, 2H), 4.29 (s, 18H), 1.27 (s, 18H).

<sup>19</sup>F NMR (282 MHz, Methylene Chloride-*d*<sub>2</sub>) δ -137.16 (dd, *J* = 23.4, 7.8 Hz), -152.98 (t, *J* = 20.8 Hz), -160.58 (td, *J* = 23.6, 22.5, 8.0 Hz).

<sup>13</sup>C NMR (75 MHz, Methylene Chloride-*d*<sub>2</sub>) δ 169.35, 158.47, 158.16, 156.03, 153.02, 152.19, 149.86 (w), 141.68 (w), 140.83 (w), 138.44 (w), 125.04, 124.82, 118.15, 117.60, 115.13 (w, t, *J* = 21.3 Hz), 37.81, 35.28, 34.68, 31.30. Low-intensity signals are denoted by w, which is caused by the reasons as explained in the characterization of **3** (*vide supra*).

HRMS-FD<sup>+</sup>: calc. for [C<sub>43</sub>H<sub>44</sub>CoF<sub>5</sub>N<sub>2</sub>O<sub>2</sub><sup>+</sup>]: 774.2655, found: 774.2604 [M]<sup>+</sup>.

X-band EPR: silent at r.t. and 20 K.

UV-Vis (32.27 μM, CH<sub>2</sub>Cl<sub>2</sub>, 1.0 cm cuvet) nm {ε, cm<sup>-1</sup>M<sup>-1</sup>}: 230, 269 {26.3×10<sup>3</sup>}, 326 {25.7×10<sup>3</sup>}, 374 {20.6×10<sup>3</sup>}, 556 {21.0×10<sup>3</sup>}, 755 {5.67×10<sup>3</sup>}.

Elemental analysis: calc. for C<sub>43</sub>H<sub>44</sub>CoF<sub>5</sub>N<sub>2</sub>O<sub>2</sub>: C 66.66; H 5.72; Co 7.61; F 12.26; N 3.62; O 4.13; found: C 65.72; H 5.87; Co 7.43; F 11.97; N 3.49; O 5.13.

μ<sub>eff</sub> (Evans' method, CD<sub>2</sub>Cl<sub>2</sub> with toluene as internal standard, 297.2 K, 7.9 mM, Δν = 0 Hz): 0 μ<sub>B</sub>

SQUID: constant susceptibility observed in the 5 K – 290 K range (Figure S1).

XRD: XRD quality single crystals were grown by slow evaporation of a concentrated solution in CH<sub>2</sub>Cl<sub>2</sub> at room temperature. The displacement ellipsoid plot (50% probability level) is depicted in the main text, and the atom numbering and relevant bond lengths are provided in Table S1. **[Co<sup>II</sup>(DPP<sup>2-</sup>)]**, C<sub>43</sub>H<sub>44</sub>CoF<sub>5</sub>N<sub>2</sub>O<sub>2</sub>, FW = 774.73, 0.45 mm × 0.14 mm × 0.12 mm, black block, monoclinic, *C*2/*c*, *a* = 11.7070(6) Å, *b* = 22.5631(15) Å, *c* = 28.4794(15) Å, β = 95.793(2), *V* = 7484.3(7) Å<sup>3</sup>, *Z* = 8, μ = 0.523 mm<sup>-1</sup>; 84122 reflections were measured. 7650 Reflections were unique (*R*<sub>int</sub> = 0.039) of which 6588 were observed [*I* > 2σ(*I*)]. Residual electron density between -0.43 and 0.50 e<sup>-</sup>/Å<sup>3</sup>. *S* = 1.07. Refinement: *R*[*F*<sup>2</sup> > 2σ(*F*<sup>2</sup>)] = 0.039, *wR*(*F*<sup>2</sup>) = 0.092, number of reflections: 7650, number of parameters: 562, number of restraints: 235.

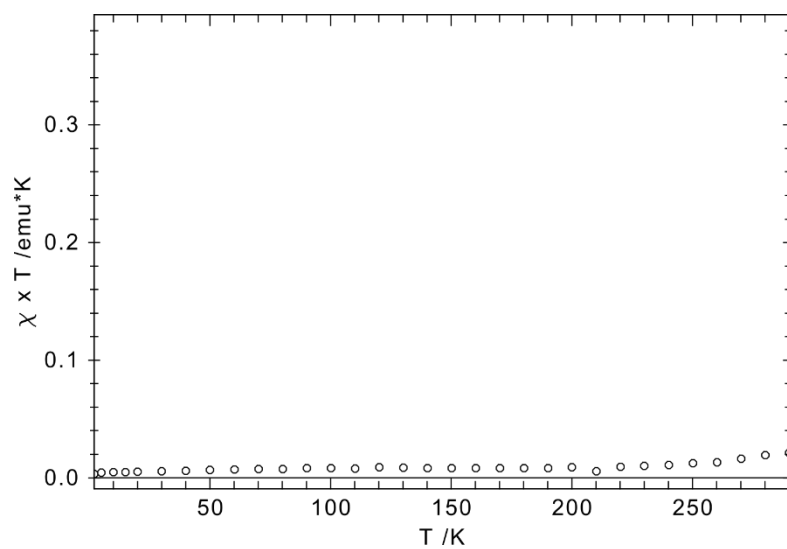

**Figure S1.** SQUID measurement of  $[\text{Co}^{\text{II}}(\text{DPP}^{2-})]$  between 5 K and 290 K, corrected for presence of small oxide nanoparticles.

**Table S1.** Atom numbering scheme for DPPH<sub>3</sub> and [Co<sup>II</sup>(DPP<sup>2-</sup>)] and bond lengths derived from the single crystal XRD measurements and the DFT calculated structure (B3LYP/def2-SVP).

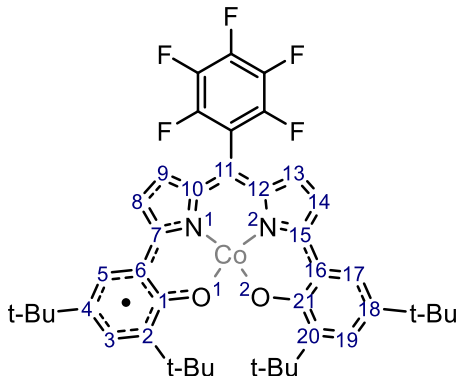


| Bond    | DPPH <sub>3</sub> (XRD, Å) | [Co <sup>II</sup> (DPP <sup>2-</sup> )] (XRD, Å) | [Co <sup>II</sup> (DPP <sup>2-</sup> )] (DFT, Å) |
|---------|----------------------------|--------------------------------------------------|--------------------------------------------------|
| C1–C2   | 1.411(2)                   | 1.443(3)                                         | 1.454                                            |
| C2–C3   | 1.395(2)                   | 1.371(3)                                         | 1.380                                            |
| C3–C4   | 1.395(2)                   | 1.420(3)                                         | 1.427                                            |
| C4–C5   | 1.385(2)                   | 1.364(3)                                         | 1.376                                            |
| C5–C6   | 1.403(2)                   | 1.416(3)                                         | 1.425                                            |
| C6–C1   | 1.408(2)                   | 1.426(3)                                         | 1.446                                            |
| C6–C7   | 1.463(2)                   | 1.413(3)                                         | 1.427                                            |
| C7–C8   | 1.426(2)                   | 1.441(3)                                         | 1.450                                            |
| C8–C9   | 1.368(2)                   | 1.342(3)                                         | 1.364                                            |
| C9–C10  | 1.422(2)                   | 1.438(3)                                         | 1.441                                            |
| C10–C11 | 1.400(2)                   | 1.390(3)                                         | 1.402                                            |
| C11–C12 | 1.395(2)                   | 1.393(3)                                         | 1.402                                            |
| C12–C13 | 1.426(2)                   | 1.434(3)                                         | 1.441                                            |
| C13–C14 | 1.364(2)                   | 1.344(3)                                         | 1.364                                            |
| C14–C15 | 1.425(2)                   | 1.445(3)                                         | 1.450                                            |
| C15–C16 | 1.462(2)                   | 1.404(3)                                         | 1.427                                            |
| C16–C17 | 1.406(2)                   | 1.418(3)                                         | 1.425                                            |
| C17–C18 | 1.382(2)                   | 1.359(3)                                         | 1.376                                            |
| C18–C19 | 1.393(2)                   | 1.422(3)                                         | 1.427                                            |
| C19–C20 | 1.395(2)                   | 1.371(3)                                         | 1.380                                            |
| C20–C21 | 1.406(2)                   | 1.444(3)                                         | 1.454                                            |
| C21–C16 | 1.403(2)                   | 1.431(3)                                         | 1.446                                            |
| C1–O1   | 1.3644(18)                 | 1.300(2)                                         | 1.287                                            |
| C21–O2  | 1.3678(18)                 | 1.288(2)                                         | 1.287                                            |
| C7–N1   | 1.3519(19)                 | 1.368(2)                                         | 1.368                                            |
| C10–N1  | 1.383(2)                   | 1.382(2)                                         | 1.381                                            |
| C12–N2  | 1.388(2)                   | 1.377(2)                                         | 1.381                                            |
| C15–N2  | 1.3493(19)                 | 1.375(2)                                         | 1.368                                            |
| Co–O1   | -                          | 1.8432(13)                                       | 1.893                                            |
| Co–O2   | -                          | 1.8457(13)                                       | 1.894                                            |
| Co–N1   | -                          | 1.8610(16)                                       | 1.913                                            |
| Co–N2   | -                          | 1.8696(15)                                       | 1.913                                            |

**[Co<sup>II</sup>(DPP<sup>2-</sup>)(THF)<sub>2</sub>]**: Obtained when dissolving **[Co<sup>II</sup>(DPP<sup>2-</sup>)]** in THF.

<sup>1</sup>H NMR (500 MHz, THF-*d*<sub>8</sub>) δ 37.51 (s, 2H), 9.34 (s, 18H), 2.51 (6H) -24.49 (s, 2H), -34.04 (s, 2H), -60.49 (s, 2H). Part of the CH<sub>3</sub> resonances (of the *t*Bu groups) are missing. This signal is gradually disappearing upon addition of THF to a CD<sub>2</sub>Cl<sub>2</sub> solution of **[Co<sup>II</sup>(DPP<sup>2-</sup>)]** (see NMR in main text). Coordinated THF is not visible because THF-*d*<sub>8</sub> was used as the solvent.

UV-Vis (32.27 μM, THF, 1.0 cm cuvet) nm {ε, cm<sup>-1</sup>M<sup>-1</sup>}: 318 {28.0×10<sup>3</sup>}, 409 {16.3×10<sup>3</sup>}, 423 {16.5×10<sup>3</sup>}, 474 {12.3×10<sup>3</sup>}, 632 {22.9×10<sup>3</sup>}, 833 {15.3×10<sup>3</sup>}.

X-band EPR: silent at r.t. and 20 K.

μ<sub>eff</sub> (Evans' method, THF-*d*<sub>8</sub> with toluene as internal standard, 297.2 K, 13.4 mM, Δν = 21.4 Hz, diamagnetic contribution = -0.00039): 2.91 μ<sub>B</sub>.

HRMS measurements afforded only detection of **[Co<sup>II</sup>(DPP<sup>2-</sup>)]** due to the relatively weak coordination of THF and the evaporation of THF under the measurement conditions.

The association constant (*K*<sub>ass</sub>) for coordination of THF (guest, G) to **[Co<sup>II</sup>(DPP<sup>2-</sup>)]** (host, H, 32.27 μM in CH<sub>2</sub>Cl<sub>2</sub>) was obtained after a titration of guest to host and fitting of the absorption band at 833 nm according to a HGG model with non-cooperative binding. The fitting was performed with the software available at <http://limhes.net/optim> and the results are summarized in Figure S2, Figure S3 and Figure S4.

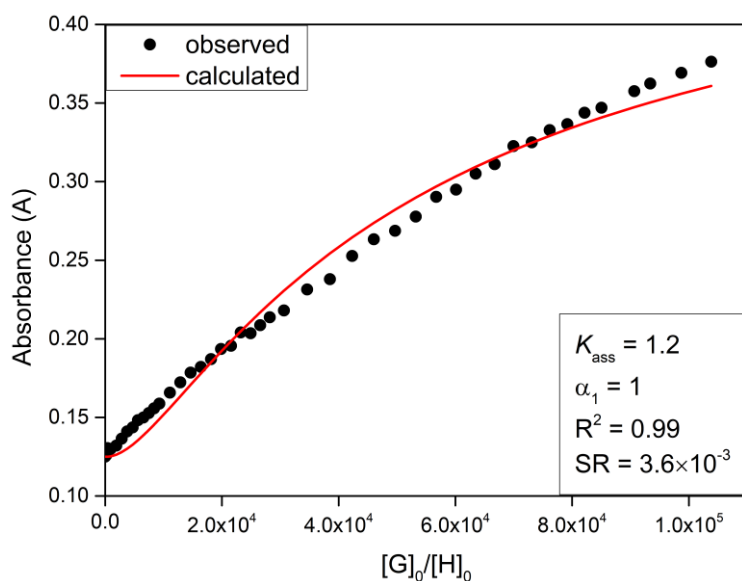

Figure S2. Fit of the changes in the absorbance at 833 nm upon titration of THF to **[Co<sup>II</sup>(DPP<sup>2-</sup>)]**.

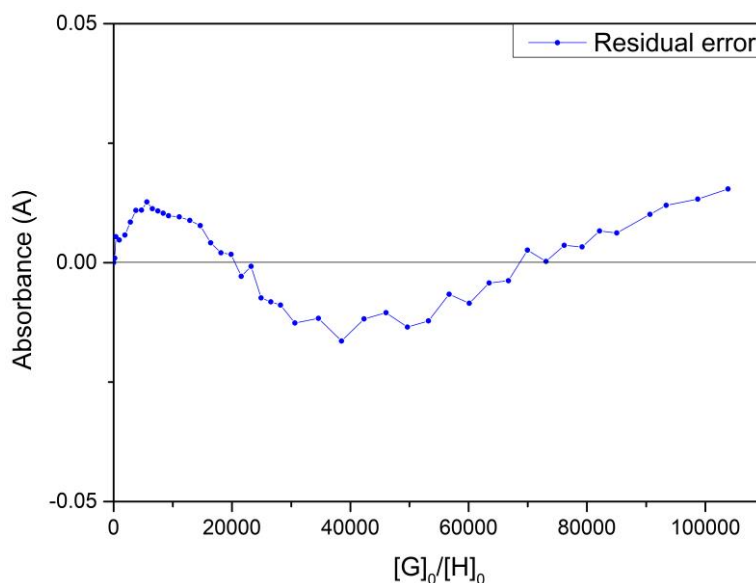

Figure S3. Residual errors of the fit of the changes in the absorption at 833 nm upon titration of THF to  $[\text{Co}^{\text{II}}(\text{DPP}^{2-})]$ .

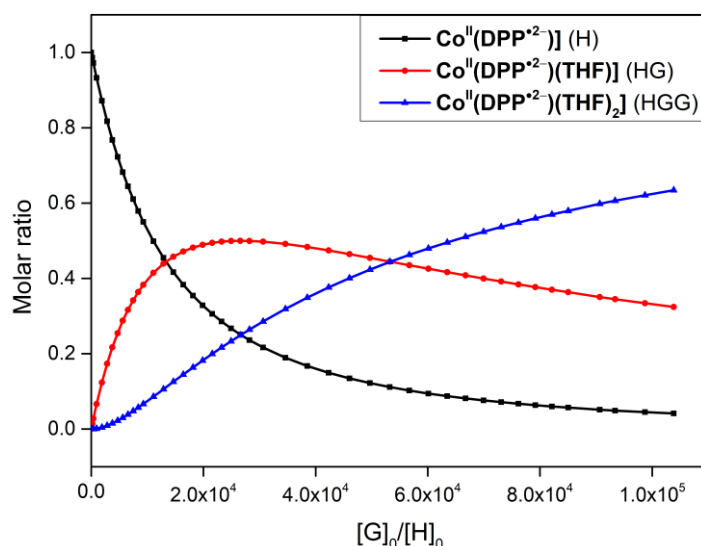

Figure S4. Calculated molar ratios from the fit of the changes in the absorption at 833 nm upon titration of THF to  $[\text{Co}^{\text{II}}(\text{DPP}^{2-})]$ .

$[\text{Co}^{\text{III}}(\text{DPP}^3)(\text{Py})_2]$ :  $[\text{Co}^{\text{II}}(\text{DPP}^{2-})]$  (0.100 g; 0.13 mmol; 1.0 eq) was dissolved in  $\text{CH}_2\text{Cl}_2$  (10 mL) and pyridine (1.05 mL; 13.0 mmol; 100 eq) was added to yield a dark green solution, which was stirred for 3 hours, concentrated and dried under reduced pressure. The product was obtained as a green powder in 120 mg; 0.13 mmol; quantitative yield.

$^1\text{H}$  NMR (500 MHz,  $\text{THF}-d_8$ )  $\delta$  8.04 (d,  $J = 5.7$  Hz, 4H), 7.60 (t,  $J = 7.6$  Hz, 2H), 7.41 (d,  $J = 2.5$  Hz, 2H), 7.21 (d,  $J = 4.6$  Hz, 2H), 7.17 (d,  $J = 2.6$  Hz, 2H), 7.08 (t,  $J = 6.7$  Hz, 4H), 6.96 (d,  $J = 4.5$  Hz, 2H), 1.59 (s, 18H), 1.25 (s, 18H).

$^{19}\text{F}$  NMR (282 MHz, Methylene Chloride- $d_2$ )  $\delta$  -140.91 (d,  $J = 23.4$  Hz), -154.76 (t,  $J = 20.8$  Hz), -161.59 -- 163.84 (m).

$^{13}\text{C}$  NMR (75 MHz, Methylene Chloride- $d_2$ )  $\delta$  158.83, 153.37, 138.13, 124.05, 36.71, 31.36. Most of the  $^{13}\text{C}$

NMR signals are missing for unknown reasons and partially due to the reasons as explained in the characterization of **3** (*vide supra*).

HRMS-ESI<sup>+</sup>: calc. for [C<sub>53</sub>H<sub>54</sub>CoF<sub>5</sub>N<sub>4</sub>O<sub>2</sub><sup>+</sup>]: 932.3499, found: 932.358 [M]<sup>+</sup>, 853.315 [M-Py]<sup>+</sup>, 774.272 [M-2Py]<sup>+</sup>.

SQUID: constant susceptibility observed in the 5 K – 290 K range (Figure S7).

UV-Vis (32.27 μM, 2.00 mL CH<sub>2</sub>Cl<sub>2</sub> + 10 μL pyridine, 1.0 cm cuvet) nm {ε, cm<sup>-1</sup>M<sup>-1</sup>}: 337 {25.0×10<sup>3</sup>}, 479 {15.0×10<sup>3</sup>}, 661 (shoulder) {13.8×10<sup>3</sup>}, 723 {26.3×10<sup>3</sup>}. See Figure S5. Addition of pyridine was necessary to prevent partial decoordination of pyridine.

XRD: XRD quality single crystals were grown by slow evaporation of a concentrated solution in CH<sub>2</sub>Cl<sub>2</sub> and MeOH (5:1) at room temperature. The displacement ellipsoid plot (50% probability level) depicted in the main text and the three crystallographically independent molecules in the asymmetric unit are depicted in Figure S6. The atom numbering scheme and bond distances are provided in

Table S2. [Co<sup>III</sup>(DPP<sup>3-</sup>)(Py)<sub>2</sub>], C<sub>53</sub>H<sub>54</sub>CoF<sub>5</sub>N<sub>4</sub>O<sub>2</sub>, FW = 932.93, black needle, 0.36 mm × 0.05 mm × 0.04 mm, triclinic, *P*-1, *a* = 15.5847(7) Å, *b* = 20.0568(8) Å, *c* = 26.1206(9) Å, α = 69.329(3)°, β = 78.077(3)°, γ = 85.913(3)°, *V* = 7474.3(5) Å<sup>3</sup>, *Z* = 6, μ = 3.21 mm<sup>-1</sup>; 96163 reflections were measured with (sin θ/λ)<sub>max</sub> = 0.617 Å<sup>-1</sup>. 29269 Reflections were unique (*R*<sub>int</sub> = 0.089) of which 19036 were observed [*I* > 2σ(*I*)]. Residual electron density between -0.53 and 0.65 e<sup>-</sup>/Å<sup>3</sup>. *S* = 0.96. Refinement: *R*[*F*<sup>2</sup> > 2σ(*F*<sup>2</sup>)] = 0.056, *wR*(*F*<sup>2</sup>) = 0.153, number of reflections: 29269, number of parameters: 1908, number of restraints: 529.

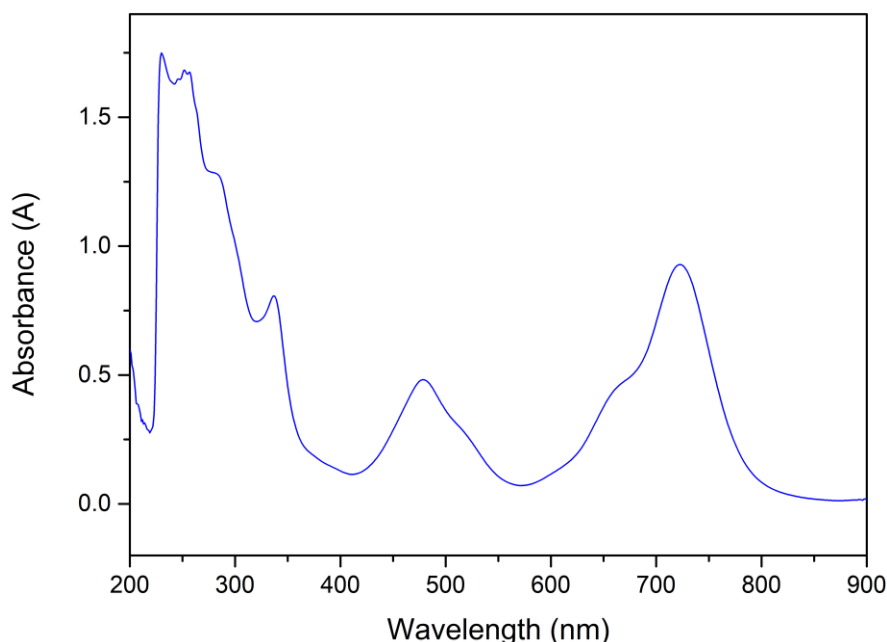

**Figure S5.** UV-Vis spectrum of [Co<sup>III</sup>(DPP<sup>3-</sup>)(Py)<sub>2</sub>] (32.27 μM) via addition of 10 μL pyridine to a 2.0 mL CH<sub>2</sub>Cl<sub>2</sub> solution of [Co<sup>II</sup>(DPP<sup>2-</sup>)].

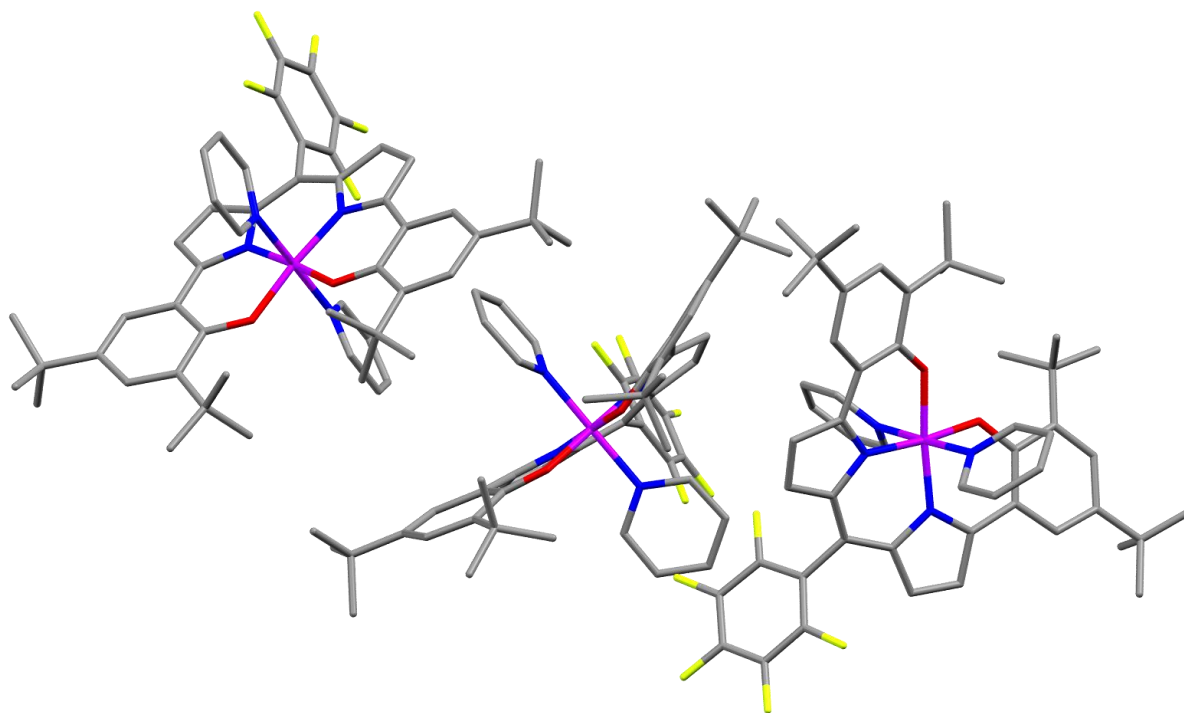

**Figure S6.** Single crystal XRD measured molecular structure of  $[\text{Co}^{\text{III}}(\text{DPP}^3\text{-})(\text{Py})_2]$ , showing the three crystallographically independent molecules in the asymmetric unit (A, B and C from left to right), depicted as wireframes. H atoms and disorder are omitted for clarity.

**Table S2.** Atom numbering scheme, bond lengths and dihedral pyridine angles for the three crystallographically independent molecules of  $[\text{Co}^{\text{III}}(\text{DPP}^{3-})(\text{Py})_2]$  (labelled A, B and C in Figure S6), and the DFT (B3LYP/def2-TZVP geometry optimization) calculated structure. Ar =  $\text{C}_6\text{F}_5$ .

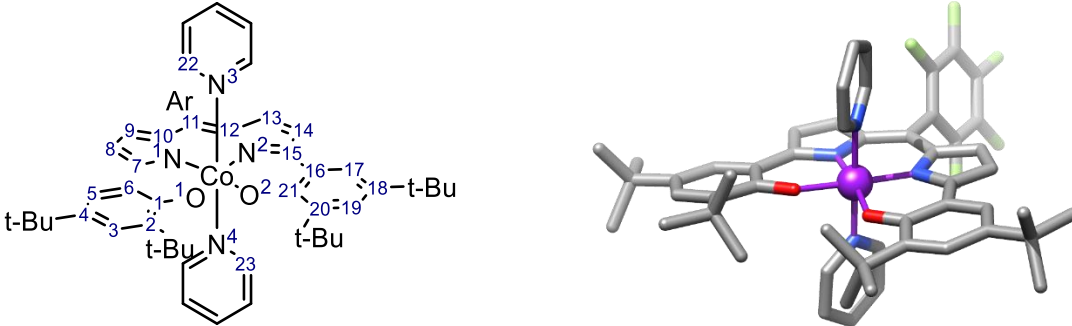

The figure shows the chemical structure of the complex  $[\text{Co}^{\text{III}}(\text{DPP}^{3-})(\text{Py})_2]$  with atom numbering. The central cobalt atom (Co) is coordinated to two pyridine rings (Py) and the DPP<sup>3-</sup> ligand. The DPP<sup>3-</sup> ligand consists of a central carbon atom (C1) bonded to two oxygen atoms (O1, O2) and a nitrogen atom (N1). The nitrogen atom (N1) is further bonded to a phenyl ring (Ar) and a tert-butyl group (t-Bu). The pyridine rings are coordinated to the cobalt atom through their nitrogen atoms (N3, N4). The 3D ball-and-stick model shows the spatial arrangement of the atoms, with the cobalt atom in purple, oxygen atoms in red, nitrogen atoms in blue, and carbon atoms in grey.

| Bond                                         | A (XRD, Å) | B (XRD, Å) | C (XRD, Å) | DFT (Å) |
|----------------------------------------------|------------|------------|------------|---------|
| C1–C2                                        | 1.435(5)   | 1.443(5)   | 1.433(5)   | 1.447   |
| C2–C3                                        | 1.395(5)   | 1.393(5)   | 1.397(5)   | 1.391   |
| C3–C4                                        | 1.394(5)   | 1.403(6)   | 1.400(5)   | 1.412   |
| C4–C5                                        | 1.369(5)   | 1.365(5)   | 1.369(5)   | 1.382   |
| C5–C6                                        | 1.400(4)   | 1.420(5)   | 1.408(5)   | 1.418   |
| C6–C1                                        | 1.429(4)   | 1.413(5)   | 1.408(5)   | 1.429   |
| C6–C7                                        | 1.453(5)   | 1.446(5)   | 1.455(5)   | 1.449   |
| C7–C8                                        | 1.438(4)   | 1.429(5)   | 1.420(5)   | 1.440   |
| C8–C9                                        | 1.357(5)   | 1.354(5)   | 1.364(5)   | 1.374   |
| C9–C10                                       | 1.420(4)   | 1.418(5)   | 1.413(5)   | 1.429   |
| C10–C11                                      | 1.382(5)   | 1.384(5)   | 1.388(5)   | 1.399   |
| C11–C12                                      | 1.394(4)   | 1.390(4)   | 1.380(5)   | 1.399   |
| C12–C13                                      | 1.415(5)   | 1.413(5)   | 1.414(5)   | 1.429   |
| C13–C14                                      | 1.358(5)   | 1.363(5)   | 1.367(5)   | 1.374   |
| C14–C15                                      | 1.435(5)   | 1.435(4)   | 1.432(5)   | 1.440   |
| C15–C16                                      | 1.441(5)   | 1.442(4)   | 1.440(5)   | 1.449   |
| C16–C17                                      | 1.411(5)   | 1.416(4)   | 1.414(4)   | 1.418   |
| C17–C18                                      | 1.368(5)   | 1.380(5)   | 1.370(5)   | 1.382   |
| C18–C19                                      | 1.395(5)   | 1.405(5)   | 1.393(5)   | 1.412   |
| C19–C20                                      | 1.380(5)   | 1.386(5)   | 1.388(5)   | 1.390   |
| C20–C21                                      | 1.437(4)   | 1.437(4)   | 1.448(5)   | 1.447   |
| C21–C16                                      | 1.419(5)   | 1.423(5)   | 1.422(5)   | 1.430   |
| C1–O1                                        | 1.323(4)   | 1.321(4)   | 1.323(4)   | 1.311   |
| C21–O2                                       | 1.326(4)   | 1.318(4)   | 1.314(4)   | 1.311   |
| C7–N1                                        | 1.356(4)   | 1.355(4)   | 1.347(4)   | 1.355   |
| C10–N1                                       | 1.399(4)   | 1.398(4)   | 1.408(4)   | 1.391   |
| C12–N2                                       | 1.401(4)   | 1.391(4)   | 1.408(4)   | 1.392   |
| C15–N2                                       | 1.358(4)   | 1.353(4)   | 1.350(4)   | 1.355   |
| Co–O1                                        | 1.923(2)   | 1.904(2)   | 1.910(2)   | 1.929   |
| Co–O2                                        | 1.913(2)   | 1.913(2)   | 1.909(2)   | 1.929   |
| Co–N1                                        | 1.912(2)   | 1.906(3)   | 1.913(3)   | 1.933   |
| Co–N2                                        | 1.912(3)   | 1.903(3)   | 1.908(3)   | 1.933   |
| Co–N3                                        | 1.975(2)   | 1.973(3)   | 1.946(3)   | 1.988   |
| Co–N4                                        | 1.963(2)   | 1.941(3)   | 1.959(3)   | 1.986   |
| <b>Dihedral angle of the pyridine planes</b> |            |            |            |         |
| C22–N3–Co–N4                                 | 10.80°     | 51.39°     | 176.11°    | 14.74°  |
| C23–N4–Co–N3                                 | 10.80°     | 7.47°      | 84.50°     | 11.80°  |



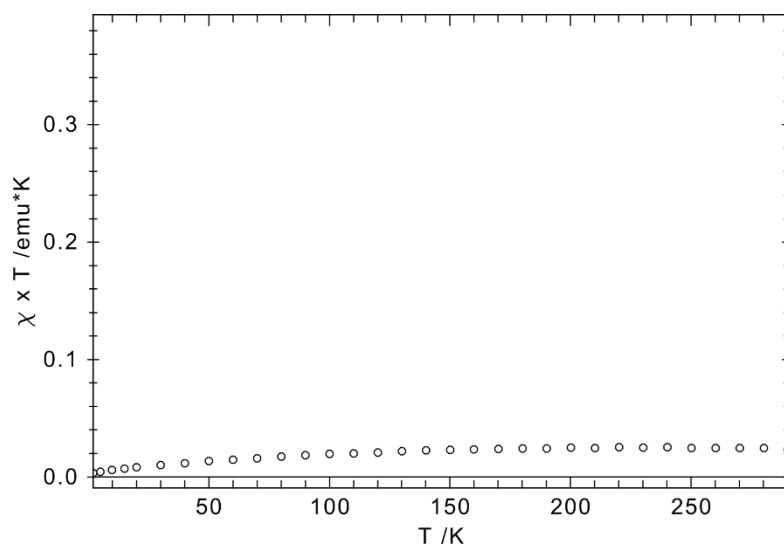

**Figure S7.** SQUID measurement of  $[\text{Co}^{\text{III}}(\text{DPP}^{3-})(\text{Py})_2]$  between 4 K and 290 K, corrected for the presence of oxide nanoparticles.

$[\text{Co}^{\text{III}}(\text{DPP}^{3-})(\text{NH}_2t\text{Bu})_2]: [\text{Co}^{\text{II}}(\text{DPP}^{2-})]$  (0.100 g; 0.13 mmol; 1.0 eq) was dissolved in  $\text{CH}_2\text{Cl}_2$  (10 mL) and *t*-butylamine (1.36 mL; 1.29 mmol; 100 eq) was added to yield a green solution, which was stirred for 3 hours, concentrated and dried under reduced pressure. The product was obtained as a green powder in quantitative yield (0.119 g; 0.13 mmol).

$^1\text{H}$  NMR (500 MHz, Methylene Chloride- $d_2$ )  $\delta$  7.67 (s, 2H), 7.31 (d,  $J = 2.6$  Hz, 2H), 7.28 (d,  $J = 4.8$  Hz, 2H), 6.85 (s, 2H), 2.11 (s, 4H), 1.74 (s, 18H), 1.39 (s, 18H), 0.52 (s, 18H).

$^{13}\text{C}$  NMR (126 MHz, Methylene Chloride- $d_2$ )  $\delta$  158.96, 156.97, 142.10, 137.80, 136.64, 130.77, 125.64, 121.84, 119.02, 115.94, 49.97, 36.15, 33.59, 31.74, 30.83. One  $^{13}\text{CH}_3$  signal is missing, presumably due to overlap. Five  $^{13}\text{C}$  NMR signal are missing for the reasons as explained in the characterization of **3** (*vide supra*).

$^{19}\text{F}$  NMR (282 MHz, Methylene Chloride- $d_2$ )  $\delta$  -137.36 – -141.36 (m), -154.75 (t,  $J = 21.2$  Hz), -160.77 – -164.48 (m).

UV-Vis (32.27  $\mu\text{M}$ ,  $\text{CH}_2\text{Cl}_2 : t\text{BuNH}_2 = 2.0 : 0.01$ , 1.0 cm cuvet) nm  $\{\epsilon, \text{cm}^{-1}\text{M}^{-1}\}$ : 276, 336 ( $30.1 \times 10^3$ ), 487 ( $16.5 \times 10^3$ ), 650 (shoulder,  $16.9 \times 10^3$ ), 705 ( $30.7 \times 10^3$ ). See Figure S8. Addition of *t*BuNH<sub>2</sub> was necessary to prevent decoordination of the amine.

HRMS-ESI<sup>+</sup> calc. for  $[\text{C}_{51}\text{H}_{66}\text{CoF}_5\text{N}_4\text{O}_2]^+$ : 920.4438, found: 847.374  $[\text{M}-t\text{BuNH}_2]^+$ , 774.283  $[\text{M}-2t\text{BuNH}_2]^+$ .

XRD: XRD quality single crystals were grown by slow evaporation of a concentrated solution in  $\text{CH}_2\text{Cl}_2$  and MeOH (5:1) at room temperature. The three crystallographically independent molecules in the asymmetric unit and the displacement ellipsoid plot (50% probability level) of one molecule is depicted in Figure S9. The atom numbering scheme and relevant bond lengths are provided in Table S3.  $[\text{Co}^{\text{III}}(\text{DPP}^{3-})(\text{NH}_2t\text{Bu})_2]$ ,  $3(\text{C}_{51}\text{H}_{66}\text{CoF}_5\text{N}_4\text{O}_2) \cdot \text{CH}_4\text{O}$ , FW = 2795.05, dark green needle, 0.35 mm  $\times$  0.04 mm  $\times$  0.03 mm, triclinic, *P*-1,  $a = 12.9446(5)$  Å,  $b = 21.7384(9)$  Å,  $c = 27.2202(9)$  Å,  $\alpha = 84.432(3)^\circ$ ,  $\beta = 89.826(3)^\circ$ ,  $\gamma = 86.438(3)^\circ$ ,  $V = 7608.7(5)$  Å<sup>3</sup>,  $Z = 2$ ,  $\mu = 3.15$  mm<sup>-1</sup>; 74031 reflections were measured with  $(\sin \theta/\lambda)_{\text{max}} = 0.616$  Å<sup>-1</sup>. 29771 Reflections were unique ( $R_{\text{int}} = 0.075$ ) of which 19074 were observed [ $I > 2\sigma(I)$ ]. Residual electron density

between  $-0.44$  and  $0.51 \text{ e}^{-}/\text{\AA}^3$ .  $S = 0.98$ . Refinement:  $R[F^2 > 2\sigma(F^2)] = 0.056$ ,  $wR(F^2) = 0.139$ , number of reflections: 29771, number of parameters: 1812, number of restraints: 39.

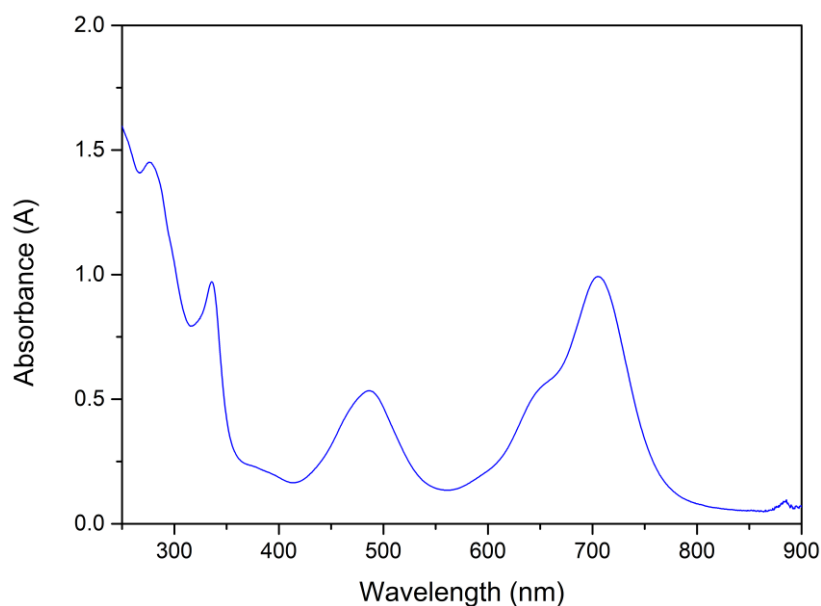

**Figure S8.** UV-Vis spectrum of  $[\text{Co}^{\text{III}}(\text{DPP}^{3-})(t\text{BuNH}_2)_2]$  ( $32.27 \mu\text{M}$ ) via addition of  $10 \mu\text{L } t\text{BuNH}_2$  to a  $2.0 \text{ mL CH}_2\text{Cl}_2$  solution of  $[\text{Co}^{\text{II}}(\text{DPP}^{2-})]$ .

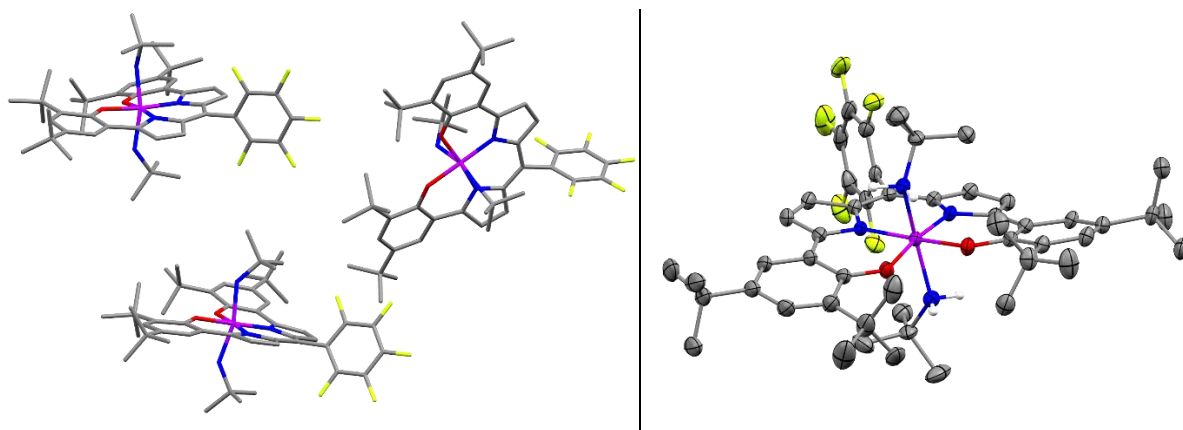

**Figure S9.** Left: single crystal XRD measured molecular structure of  $[\text{Co}^{\text{III}}(\text{DPP}^{3-})(\text{NH}_2t\text{Bu})_2]$ , showing the three crystallographically independent molecules in the asymmetric unit (A, B and C from left to right), depicted as wireframes. H atoms and lattice solvent molecules are omitted for clarity. Right: Displacement ellipsoid plot (50% probability level) of  $[\text{Co}^{\text{III}}(\text{DPP}^{3-})(\text{NH}_2t\text{Bu})_2]$  (molecule A). H atoms (except NH) are omitted for clarity.

**Table S3.** Atom numbering scheme for the three crystallographically independent molecules of  $[\text{Co}^{\text{III}}(\text{DPP}^{3-})(\text{NH}_2\text{t-Bu})_2]$  (labelled A, B and C) and DFT (B3LYP/def2-TZVP geometry optimization) calculated structure. Ar =  $\text{C}_6\text{F}_5$ . Bond lengths derived from the single crystal XRD measurements and the DFT calculated structure are included below.

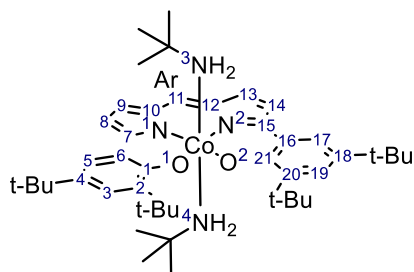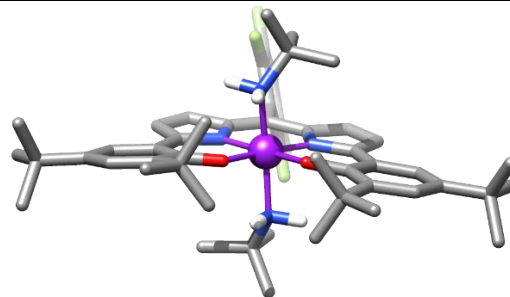

| Bond    | A (XRD, Å) | B (XRD, Å) | C (XRD, Å) | DFT (Å) |
|---------|------------|------------|------------|---------|
| C1–C2   | 1.441(5)   | 1.436(4)   | 1.437(4)   | 1.445   |
| C2–C3   | 1.386(5)   | 1.386(4)   | 1.390(4)   | 1.390   |
| C3–C4   | 1.398(6)   | 1.406(4)   | 1.399(5)   | 1.413   |
| C4–C5   | 1.375(5)   | 1.364(5)   | 1.378(5)   | 1.382   |
| C5–C6   | 1.423(4)   | 1.423(4)   | 1.417(4)   | 1.418   |
| C6–C1   | 1.408(5)   | 1.416(4)   | 1.416(4)   | 1.429   |
| C6–C7   | 1.444(5)   | 1.437(4)   | 1.450(4)   | 1.452   |
| C7–C8   | 1.425(5)   | 1.442(4)   | 1.429(4)   | 1.439   |
| C8–C9   | 1.357(5)   | 1.357(5)   | 1.365(5)   | 1.375   |
| C9–C10  | 1.418(4)   | 1.422(4)   | 1.422(4)   | 1.427   |
| C10–C11 | 1.388(4)   | 1.390(5)   | 1.384(4)   | 1.396   |
| C11–C12 | 1.382(4)   | 1.398(5)   | 1.394(4)   | 1.398   |
| C12–C13 | 1.420(4)   | 1.407(5)   | 1.424(4)   | 1.428   |
| C13–C14 | 1.358(5)   | 1.365(5)   | 1.354(4)   | 1.375   |
| C14–C15 | 1.428(4)   | 1.423(5)   | 1.425(4)   | 1.438   |
| C15–C16 | 1.452(4)   | 1.444(5)   | 1.451(4)   | 1.451   |
| C16–C17 | 1.417(4)   | 1.412(4)   | 1.424(4)   | 1.418   |
| C17–C18 | 1.381(5)   | 1.376(5)   | 1.373(4)   | 1.383   |
| C18–C19 | 1.402(5)   | 1.393(5)   | 1.399(5)   | 1.413   |
| C19–C20 | 1.381(5)   | 1.396(5)   | 1.389(4)   | 1.391   |
| C20–C21 | 1.431(5)   | 1.437(4)   | 1.443(4)   | 1.444   |
| C21–C16 | 1.408(4)   | 1.409(5)   | 1.403(4)   | 1.427   |
| C1–O1   | 1.333(4)   | 1.331(4)   | 1.330(4)   | 1.313   |
| C21–O2  | 1.326(4)   | 1.339(4)   | 1.330(4)   | 1.315   |
| C7–N1   | 1.359(4)   | 1.363(4)   | 1.356(4)   | 1.357   |
| C10–N1  | 1.390(4)   | 1.394(4)   | 1.398(4)   | 1.390   |
| C12–N2  | 1.403(4)   | 1.398(4)   | 1.391(4)   | 1.391   |
| C15–N2  | 1.370(4)   | 1.361(4)   | 1.351(4)   | 1.358   |
| Co–O1   | 1.917(2)   | 1.928(2)   | 1.911(2)   | 1.924   |
| Co–O2   | 1.920(2)   | 1.921(2)   | 1.925(2)   | 1.935   |
| Co–N1   | 1.912(3)   | 1.914(2)   | 1.912(2)   | 1.932   |
| Co–N2   | 1.922(3)   | 1.913(3)   | 1.914(3)   | 1.938   |
| Co–N3   | 2.003(3)   | 2.001(3)   | 1.993(3)   | 2.019   |
| Co–N4   | 1.997(3)   | 2.003(3)   | 2.008(3)   | 2.024   |

**[Co<sup>III</sup>(DPP<sup>3-</sup>)(NH<sub>2</sub>Ad)<sub>2</sub>]: [Co<sup>II</sup>(DPP<sup>2-</sup>)]** (10.0 mg; 13.0 μmol; 1.0 eq) and 1-adamantylamine (3.9 mg; 26.0 μmol; 2.0 eq) were dissolved in CH<sub>2</sub>Cl<sub>2</sub> (10 mL) and stirred for 3 hours at r.t. yielding a green solution. Single crystals suitable for XRD analysis were obtained by slow evaporation of a concentrated solution in CH<sub>2</sub>Cl<sub>2</sub> and MeOH (5:1). The green crystals were filtered and washed with MeOH (2 mL). The product was obtained as green crystals in 6.0 mg; 5.6 μmol; 43% yield.

<sup>1</sup>H NMR (500 MHz, Methylene Chloride-*d*<sub>2</sub>) δ 7.54 (s, 2H), 7.38 – 7.14 (m, 4H), 6.94 (s, 2H), 2.09 (s, 4H), 1.79 – 0.59 (m, 48H).

HRMS-ESI<sup>+</sup> calc. for [C<sub>63</sub>H<sub>78</sub>CoF<sub>5</sub>N<sub>4</sub>O<sub>2</sub>]<sup>+</sup>: 1076.5371, found: 1076.5386 [M]<sup>+</sup>.

XRD: XRD quality single crystals were grown by slow evaporation of a concentrated solution in CH<sub>2</sub>Cl<sub>2</sub> and MeOH (5:1) at room temperature. The displacement ellipsoid plot (50% probability level) with relevant bond lengths is provided in Table S4. **[Co<sup>III</sup>(DPP<sup>3-</sup>)(NH<sub>2</sub>Ad)<sub>2</sub>]**, C<sub>63</sub>H<sub>78</sub>CoF<sub>5</sub>N<sub>4</sub>O<sub>2</sub>, FW = 1077.22, 0.71 mm × 0.15 mm × 0.15 mm, green block, orthorhombic, *Pbca*, *a* = 18.0240(10) Å, *b* = 24.2843(13) Å, *c* = 25.7668(14) Å, α = β = γ = 90°, *V* = 11278.1(11) Å<sup>3</sup>, *Z* = 8, μ = 0.368 mm<sup>-1</sup>; 299626 reflections were measured. 12941 Reflections were unique (*R*<sub>int</sub> = 0.062) of which 10510 were observed [*I* > 2σ(*I*)]. Residual electron density between -0.59 and 0.76 e<sup>-</sup>/Å<sup>3</sup>. *S* = 1.12. Refinement: *R*[*F*<sup>2</sup> > 2σ(*F*<sup>2</sup>)] = 0.053, *wR*(*F*<sup>2</sup>) = 0.118, number of reflections: 12941, number of parameters: 892, number of restraints: 869.

**Table S4.** Atom numbering scheme for  $[\text{Co}^{\text{III}}(\text{DPP}^{3-})(\text{NH}_2\text{Ad})_2]$ , single crystal XRD measured structure and relevant bond lengths. Ellipsoid level set at 50% probability. Hydrogen atoms (except NH) and disorder in *t*Bu,  $\text{C}_6\text{F}_5$  and adamantyl are omitted for clarity. Ar =  $\text{C}_6\text{F}_5$ .

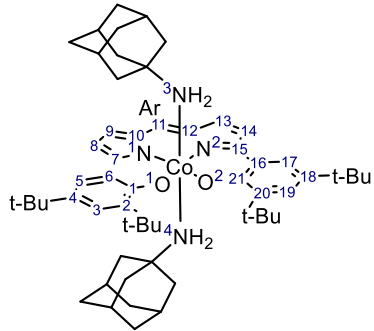


| Bond    | XRD (Å)  | Bond    | XRD (Å)    |
|---------|----------|---------|------------|
| C1–C2   | 1.437(3) | C17–C18 | 1.374(3)   |
| C2–C3   | 1.386(3) | C18–C19 | 1.406(3)   |
| C3–C4   | 1.402(3) | C19–C20 | 1.383(3)   |
| C4–C5   | 1.372(3) | C20–C21 | 1.432(3)   |
| C5–C6   | 1.412(3) | C21–C16 | 1.414(3)   |
| C6–C1   | 1.417(3) | C1–O1   | 1.326(2)   |
| C6–C7   | 1.447(3) | C21–O2  | 1.330(2)   |
| C7–C8   | 1.430(3) | C7–N1   | 1.352(3)   |
| C8–C9   | 1.361(3) | C10–N1  | 1.388(3)   |
| C9–C10  | 1.421(3) | C12–N2  | 1.393(3)   |
| C10–C11 | 1.388(3) | C15–N2  | 1.353(3)   |
| C11–C12 | 1.384(3) | Co–O1   | 1.9193(15) |
| C12–C13 | 1.418(3) | Co–O2   | 1.9332(14) |
| C13–C14 | 1.357(3) | Co–N1   | 1.9145(17) |
| C14–C15 | 1.431(3) | Co–N2   | 1.9173(17) |
| C15–C16 | 1.447(3) | Co–N3   | 2.0034(18) |
| C16–C17 | 1.415(3) | Co–N4   | 2.0103(19) |

## Complete Active Space Self Consistent Field Calculations

The NEVPT2 corrected CASSCF calculations were performed according to the method described in the general considerations.

### *[Co<sup>II</sup>(DPP<sup>2-</sup>)] NEVPT2-CASSCF(18,14)*

The energy for the singlet state and its contributors for **[Co<sup>II</sup>(DPP<sup>2-</sup>)]** was obtained from NEVPT2 corrected CASSCF(18,14) calculations and are reported in Table S5. All initial active orbitals were preserved in the active space. It is observed that the singlet state has >96% multi-reference character and is best described as a broken-symmetry singlet (BSS) solution. CASSCF(18,14) or CASSCF(8,7) calculations on the triplet state did not converge after multiple attempts and the active space was not preserved in these calculations. State averaging of the singlet and triplet state in a NEVPT2-CASSCF(18,14) calculation afforded a solution which is +6.48 kcal mol<sup>-1</sup> (total energy = -2385460,093 kcal mol<sup>-1</sup>) less stable than the found singlet state as depicted in Table S5. These findings are consistent with the experimentally found BSS/OSS spin state. A quantitative orbital analysis of the complete active space of the broken symmetry singlet state is shown in Figure S10. The most relevant active orbitals and an assignment of the electronic structure (from Löwdin population analysis) of the broken symmetry singlet state are shown in the main text.

**Table S5.** Total energy (NEVPT2 corrected) for the singlet states and their contributions for the single-root NEVPT2-CASSCF(18,14) calculation on **[Co<sup>II</sup>(DPP<sup>2-</sup>)]**. The most important contributions of the state are highlighted in grey.

| Multiplicity | Total energy (kcal mol <sup>-1</sup> ) | Contribution : state    |
|--------------|----------------------------------------|-------------------------|
| 1 (singlet)  | -2385466.571                           | 0.45476 : 2222222200000 |
|              |                                        | 0.40887 : 2222222020000 |
|              |                                        | 0.03292 : 2222221111000 |
|              |                                        | 0.01103 : 2222220202000 |
|              |                                        | 0.01002 : 2222220022000 |
|              |                                        | 0.00461 : 2222022200200 |
|              |                                        | 0.00437 : 2222212110010 |
|              |                                        | 0.00417 : 2220222200200 |
|              |                                        | 0.00413 : 2222022020200 |
|              |                                        | 0.00378 : 2222112200011 |
|              |                                        | 0.00375 : 2220222020200 |
|              |                                        | 0.00340 : 2222112020011 |

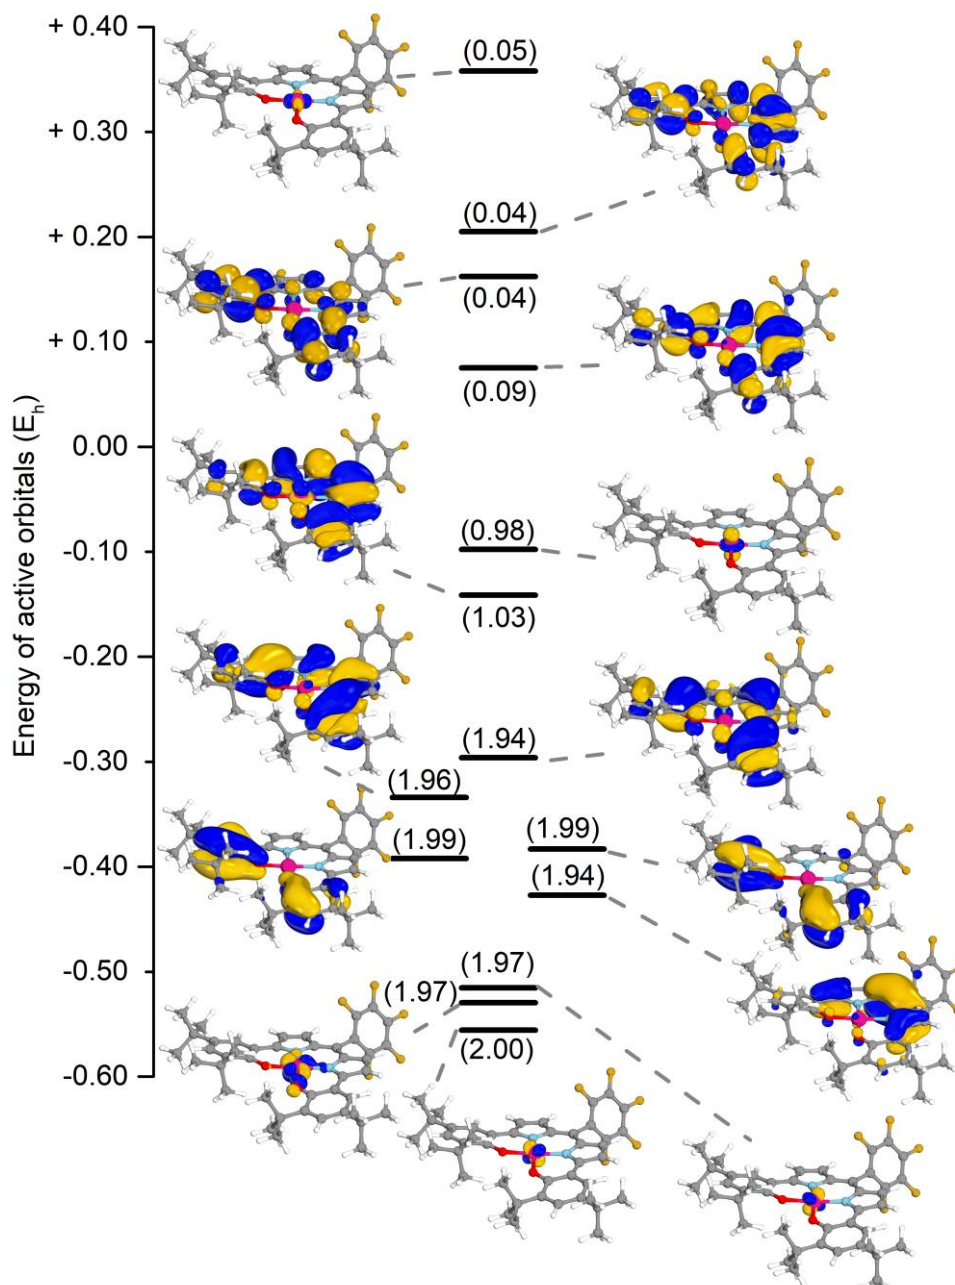

**Figure S10.** Active space and occupancies of the orbitals in parenthesis of a NEVPT2-CASSCF(18,14) calculation on  $[\text{Co}^{\text{II}}(\text{DPP}^{2-})]$ . Isosurface set to 80.

*$[\text{Co}^{\text{II}}(\text{DPP}^{2-})(\text{THF})_2]$  NEVPT2-CASSCF(18,15)*

The total and relative energies for the singlet, triplet and quintet states and their contributors for  $[\text{Co}^{\text{II}}(\text{DPP}^{2-})(\text{THF})_2]$  were obtained from NEVPT2 corrected CASSCF(18,15) calculations and are reported in Table S6. All initial active orbitals, except the  $d_{xy}$  orbital, were preserved in the active space. The  $d_{xy}$  orbital is found to be non-correlated and doubly filled in the inactive space. A quantitative orbital analysis of the complete active space of the triplet state is shown in Figure S11. The most relevant active orbitals and an assignment of the electronic structure (from Löwdin population analysis) of the triplet state are shown in the main text.

**Table S6.** Total energy (NEVPT2 corrected) for the singlet, triplet and quintet states and their contributors for the single-root NEVPT2-CASSCF(18,15) calculation on  $[\text{Co}^{\text{II}}(\text{DPP}^{2-})(\text{THF})_2]$ . The most important contributions of the states are highlighted in grey.

| Multiplicity              | Total and relative energy (kcal mol <sup>-1</sup> ) | Contribution : state      |
|---------------------------|-----------------------------------------------------|---------------------------|
| 1 (singlet)               | -2676607.654<br>(+32.2)                             | 0.81815 : 222222221100000 |
|                           |                                                     | 0.01380 : 222212221110000 |
|                           |                                                     | 0.01197 : 222222021100020 |
|                           |                                                     | 0.01025 : 222221221110000 |
|                           |                                                     | 0.00938 : 222022221100002 |
|                           |                                                     | 0.00926 : 220222221100002 |
|                           |                                                     | 0.00504 : 222211221120000 |
|                           |                                                     | 0.00494 : 222222212100000 |
|                           |                                                     | 0.00477 : 222222201100200 |
|                           |                                                     | 0.00473 : 222202221120000 |
|                           |                                                     | 0.00452 : 202222221100002 |
|                           |                                                     | 0.00446 : 222222211110000 |
|                           |                                                     | 0.00427 : 222222201102000 |
|                           |                                                     | 0.00406 : 222221211100200 |
|                           |                                                     | 0.00361 : 222221211101100 |
|                           |                                                     | 0.00356 : 221122221200001 |
| 0.00338 : 222220221100200 |                                                     |                           |
| 0.00312 : 222221121100020 |                                                     |                           |
| 0.00266 : 222220221120000 |                                                     |                           |
| 3 (triplet)               | -2676639.862<br>(= 0)                               | 0.36435 : 222222211200000 |
|                           |                                                     | 0.27900 : 222222211000000 |
|                           |                                                     | 0.13337 : 222221221200000 |
|                           |                                                     | 0.01962 : 222122221200000 |
|                           |                                                     | 0.01209 : 222222211020000 |
|                           |                                                     | 0.01001 : 222222212100000 |
|                           |                                                     | 0.00755 : 221222211201000 |
|                           |                                                     | 0.00637 : 222222201120000 |
|                           |                                                     | 0.00636 : 222222121200000 |
|                           |                                                     | 0.00578 : 212222212200000 |
|                           |                                                     | 0.00564 : 212222222100000 |
|                           |                                                     | 0.00553 : 220222211202000 |
|                           |                                                     | 0.00530 : 122222220201000 |
|                           |                                                     | 0.00472 : 221221221201000 |
|                           |                                                     | 0.00305 : 222221222100000 |
|                           |                                                     | 0.00270 : 220221221202000 |
| 0.00259 : 221122221201000 |                                                     |                           |
| 0.00258 : 222212221200000 |                                                     |                           |
| 0.00252 : 221222221101000 |                                                     |                           |
| 5 (quintet)               | -2676606.869<br>(+33.0)                             | 0.82815 : 222222211110000 |
|                           |                                                     | 0.01094 : 112222212210000 |
|                           |                                                     | 0.00906 : 221222211111000 |
|                           |                                                     | 0.00634 : 222212211111000 |
|                           |                                                     | 0.00602 : 222222111111000 |
|                           |                                                     | 0.00569 : 112222212120000 |
|                           |                                                     | 0.00366 : 222221221110000 |
|                           |                                                     | 0.00359 : 222122211111000 |
|                           |                                                     | 0.00321 : 222211211110011 |



---

0.00313 : 222222011110020  
0.00313 : 222222011110200  
0.00286 : 220222211112000  
0.00281 : 222220211110002  
0.00277 : 221212211112000  
0.00266 : 222212111110020

---

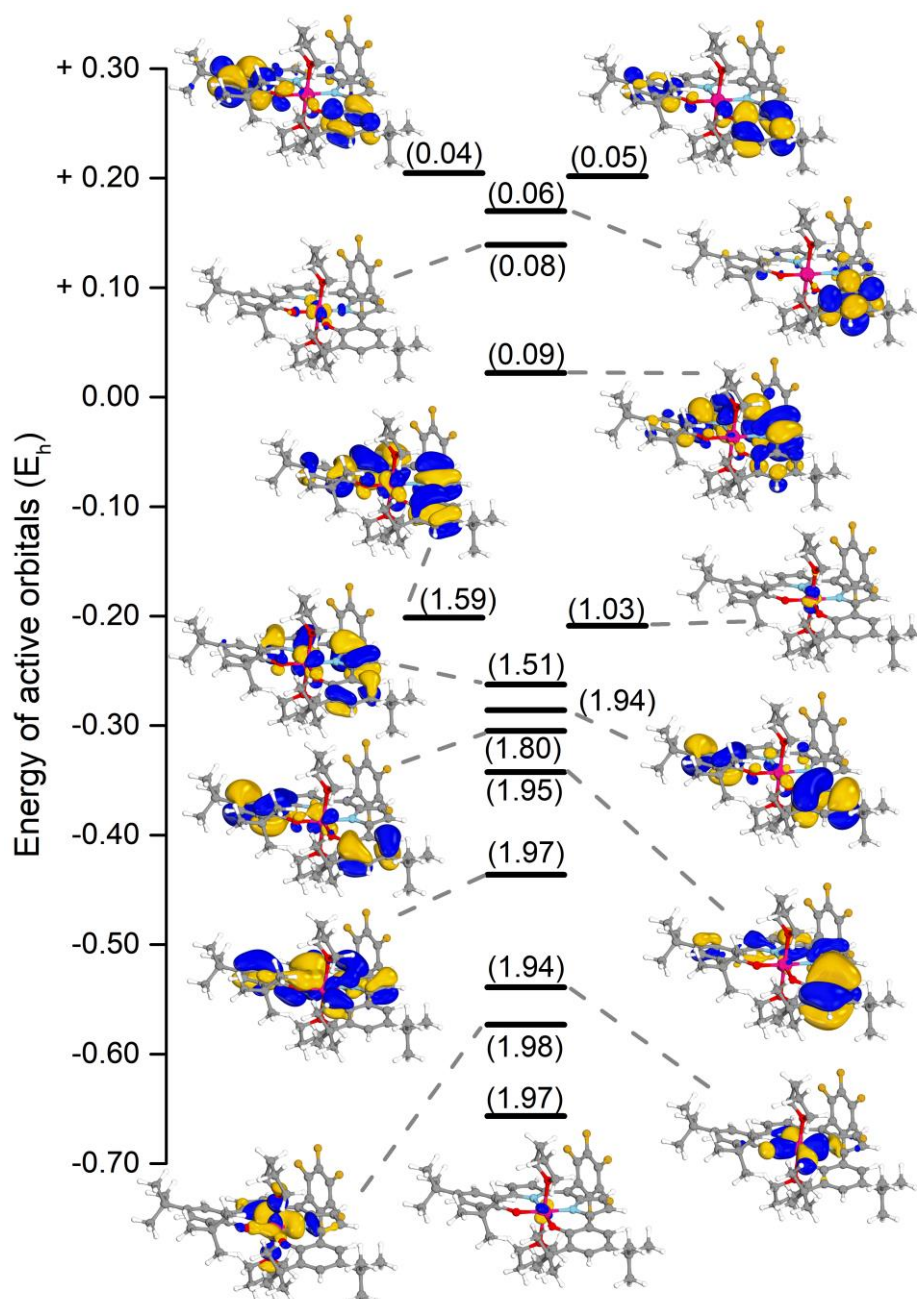

**Figure S11.** Active space and occupancies of the orbitals in parenthesis of a NEVPT2-CASSCF(18,15) calculation on  $[\text{Co}^{\text{II}}(\text{DPP}^{2-})(\text{THF})_2]$ . Isosurface set to 80.

*[Co<sup>II</sup>(DPP<sup>2-</sup>)(THF)] NEVPT2-CASSCF(14,10)*

The total and relative energies for the singlet, triplet and quintet states and their contributors for **[Co<sup>II</sup>(DPP<sup>2-</sup>)(THF)]** were obtained from NEVPT2 corrected CASSCF(14,10) calculations and are reported in Table S7. All initial active orbitals were preserved in the active space. A quantitative orbital analysis of the complete active space of the triplet state is shown in Figure S12. A total of 4 unpaired electrons (3 of  $\alpha$ -spin and 1 of  $\beta$ -spin) in the most dominant contribution to the wavefunction on cobalt and the ligand gives rise to the most stable net triplet spin state of the complex, although the open-shell singlet (+1.1 kcal mol<sup>-1</sup>, one  $\alpha$ - and one  $\beta$ -spin electron in the most dominant contributor) and quintet (+1.0 kcal mol<sup>-1</sup>, 4  $\alpha$ -spin electrons in the most dominant contributor) are very close in energy. These small energy differences between the spin states are to be expected for the conversion of an open-shell singlet (**[Co<sup>II</sup>(DPP<sup>2-</sup>)**) to a triplet (**[Co<sup>II</sup>(DPP<sup>2-</sup>)(THF)<sub>2</sub>]**) spin state.

**Table S7.** Total energy (NEVPT2 corrected) for the singlet, triplet and quintet states and their contributors for the single-root NEVPT2-CASSCF(14,10) calculation on **[Co<sup>II</sup>(DPP<sup>2-</sup>)(THF)]**. The most important contributions of the states are highlighted in grey.

| Multiplicity | Total and relative energy (kcal mol <sup>-1</sup> ) | Contribution : state |
|--------------|-----------------------------------------------------|----------------------|
| 1 (singlet)  | -2531034.609<br>(+1.1)                              | 0.89986 : 2222221100 |
|              |                                                     | 0.03375 : 2222211110 |
|              |                                                     | 0.02128 : 2222201120 |
|              |                                                     | 0.01053 : 2220221102 |
|              |                                                     | 0.00874 : 2202221102 |
|              |                                                     | 0.00532 : 2222122100 |
|              |                                                     | 0.00368 : 2211221201 |
|              |                                                     | 0.00347 : 2222112110 |
| 3 (triplet)  | -2531035.758<br>(= 0)                               | 0.63824 : 2222211110 |
|              |                                                     | 0.13044 : 2222220110 |
|              |                                                     | 0.10802 : 2222202110 |
|              |                                                     | 0.02690 : 2222111111 |
|              |                                                     | 0.01495 : 2222221010 |
|              |                                                     | 0.01335 : 2112212210 |
|              |                                                     | 0.01089 : 2222201210 |
|              |                                                     | 0.01065 : 2222011112 |
| 5 (quintet)  | -2531034.798<br>(+1.0)                              | 0.92161 : 2222211110 |
|              |                                                     | 0.02881 : 2222111111 |
|              |                                                     | 0.01782 : 2222011112 |
|              |                                                     | 0.00479 : 1222111112 |
|              |                                                     | 0.00427 : 1222211111 |
|              |                                                     | 0.00316 : 2221221110 |
|              |                                                     | 0.00278 : 2221121111 |
|              |                                                     | 0.00277 : 2212211120 |

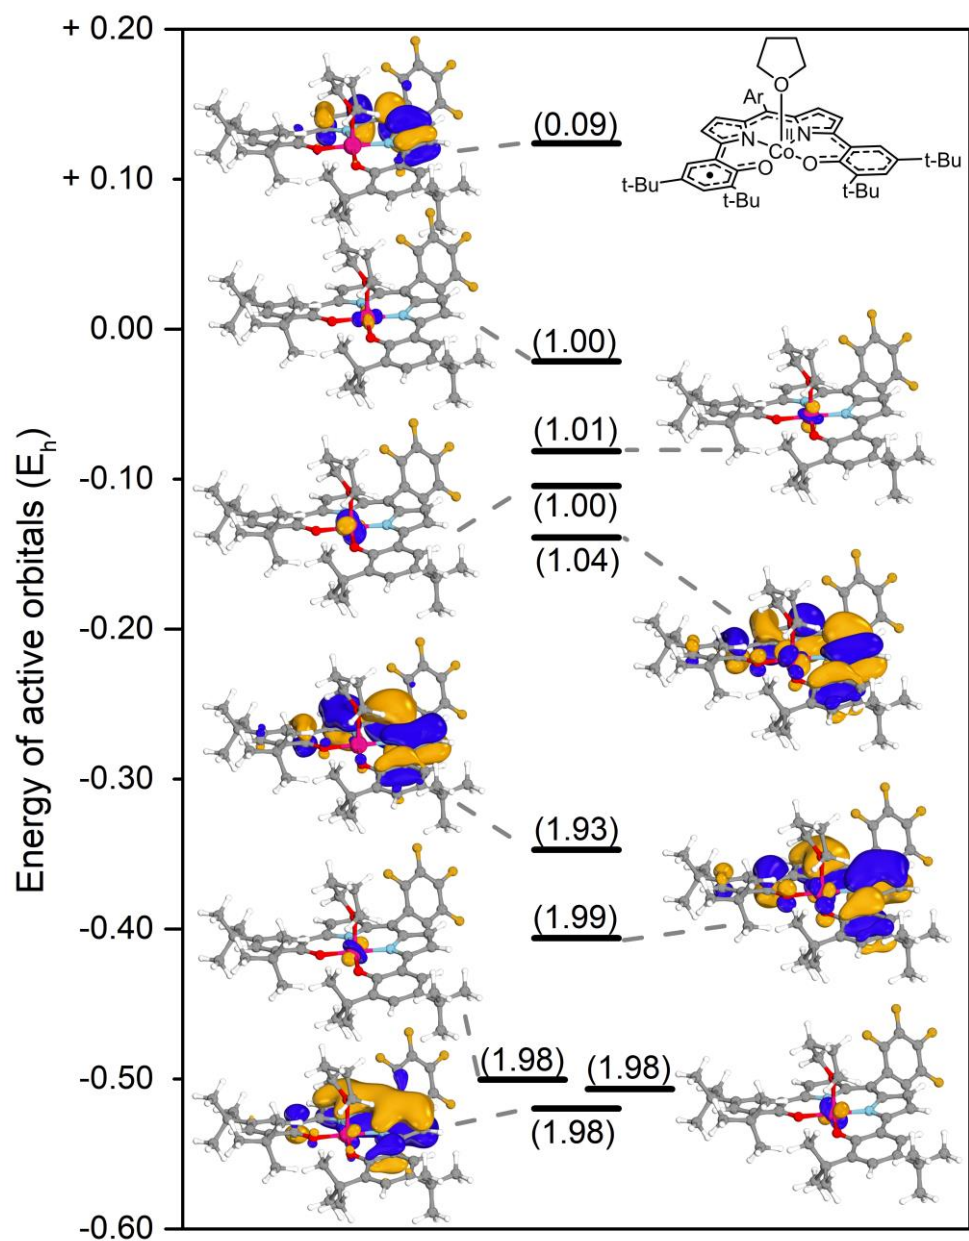

**Figure S12.** Active space and occupancies of the orbitals in parenthesis of a NEVPT2-CASSCF(14,10) calculation on  $[\text{Co}^{\text{II}}(\text{DPP}^{2-})(\text{THF})]$  in the triplet spin state. Isosurface set to 80.

## Density Functional Theory calculations

All calculations were performed according to the methods described in the general considerations. Calculations with the GGA BP86 functional were not able to reproduce the experimentally found spin states. The correlation between theory and experiment was found upon usage of the hybrid functional B3LYP. However, in combination with the def2-TZVP basis set on an m4 grid, geometry optimization and frequency analysis was too expensive (>30 days wall time). Usage of the def2-SVP basis set afforded geometries with similar bond-lengths as found in the crystal structures, we therefore optimized geometries and performed frequency analysis at the B3LYP/def2-SVP/disp3/m4-grid level of theory. A single point energy SCF calculation at the B3LYP/def2-TZVP/disp3/m4-grid level of theory was then performed for final energy evaluation, wherein the previously calculated vibrations were used.

### Absolute energies for all DFT optimized structures

The relevant  $\langle s^2 \rangle$ ,  $\Delta H^\circ_{298K}$ ,  $\Delta S^\circ_{298K}$  and  $\Delta G^\circ_{298K}$  (in Hartree) for all relevant compounds is depicted in Table S8. Relevant bond lengths are depicted above in Table S1,

Table S2 and Table S3.

**Table S8.** Calculated  $\langle s^2 \rangle$ , SCF corrections, ZPE corrections, enthalpy corrections and  $\Delta G^\circ_{298K}$  (in Hartree) and relative energies (in kcal mol<sup>-1</sup> relative to **[Co<sup>II</sup>(DPP<sup>2-</sup>)]**) for the different complexes and spin states at the B3LYP/def2-SVP//B3LYP/def2-TZVP level of theory on an m4 grid with Grimme's version 3 zero-damping dispersion corrections.

| Compound                                                    | Spin state               | $\langle s^2 \rangle$ | SCF (Hartree) | ZPE (Hartree) | Enthalpy correction (Hartree) | Entropy correction (Hartree) | $\Delta G^\circ_{298K}$ (Hartree) | Relative energy (kcal mol <sup>-1</sup> ) |
|-------------------------------------------------------------|--------------------------|-----------------------|---------------|---------------|-------------------------------|------------------------------|-----------------------------------|-------------------------------------------|
| <b>[Co<sup>II</sup>(DPP<sup>2-</sup>)]</b>                  | OSS                      | 1.0250                | -3806.67821   | 0.77833       | 0.82930                       | 0.69608                      | -3805.98213                       | = 0 <sup>a,b</sup>                        |
|                                                             | OSS/Triplet <sup>c</sup> | 2.0310                | -3806.67909   | 0.77833       | 0.82930                       | 0.69595                      | -3805.98314                       | -                                         |
|                                                             | CSS                      | -                     | -3806.65526   | 0.77896       | 0.82972                       | 0.69780                      | -3805.95746                       | +14.8                                     |
|                                                             | Triplet                  | 2.0312                | -3806.67920   | 0.77843       | 0.82939                       | 0.69600                      | -3805.98319                       | -1.3                                      |
| <b>[Co<sup>II</sup>(DPP<sup>2-</sup>)(THF)]</b>             | OSS                      | 1.0301                | -4039.10798   | 0.89644       | 0.95382                       | 0.80579                      | -4038.30219                       | -3.1 <sup>b</sup>                         |
|                                                             | OSS/Triplet <sup>c</sup> | 2.0302                | -4039.10975   | 0.89644       | 0.95382                       | 0.80567                      | -4038.30408                       | -                                         |
|                                                             | CSS                      | -                     | -4039.07864   | 0.89821       | 0.95486                       | 0.80934                      | -4038.26930                       | +16.3                                     |
|                                                             | Triplet                  | 2.0298                | -4039.10979   | 0.89658       | 0.95391                       | 0.80583                      | -4038.30396                       | -5.5                                      |
|                                                             | Quintet                  | 6.0314                | -4039.10110   | 0.89378       | 0.95210                       | 0.80038                      | -4038.30072                       | -3.4                                      |
| <b>[Co<sup>II</sup>(DPP<sup>2-</sup>)(THF)<sub>2</sub>]</b> | OSS                      | 1.0288                | -4271.53298   | 1.01440       | 1.07829                       | 0.91420                      | -4270.61878                       | -4.2 <sup>b</sup>                         |
|                                                             | OSS/Triplet <sup>c</sup> | 2.0299                | -4271.53551   | 1.01440       | 1.07829                       | 0.91408                      | -4270.62144                       | -                                         |
|                                                             | CSS                      | -                     | -4271.52490   | 1.01773       | 1.08029                       | 0.92114                      | -4270.60376                       | +3.5                                      |
|                                                             | Triplet                  | 2.0271                | -4271.53555   | 0.90977       | 1.07666                       | 1.01200                      | -4270.62578                       | -10.3                                     |
|                                                             | Quintet                  | 6.0350                | -4271.52843   | 1.01200       | 1.07666                       | 0.90969                      | -4270.61874                       | -5.9                                      |

|                                                                                   |                          |        |             |         |         |         |                           |                   |
|-----------------------------------------------------------------------------------|--------------------------|--------|-------------|---------|---------|---------|---------------------------|-------------------|
| $(\text{DPP}^{2-})(\text{Py})$<br>$[\text{Co}^{\text{II}}]$                       | OSS                      | 1.0301 | -4054.93817 | 0.86876 | 0.92557 | 0.77851 | -4054.15966               | -6.3 <sup>b</sup> |
|                                                                                   | OSS/Triplet <sup>c</sup> | 2.0318 | -4054.94036 | 0.86876 | 0.92557 | 0.77839 | -4054.16197               | -                 |
|                                                                                   | CSS                      | -      | -4054.92546 | 0.87083 | 0.92684 | 0.78231 | -4054.14314               | +2.6              |
|                                                                                   | Triplet                  | 2.0314 | -4054.94043 | 0.86900 | 0.92570 | 0.77872 | -4054.16171               | -9.1              |
| $(\text{DPP}^{3-})(\text{Py})_2$<br>$[\text{Co}^{\text{III}}]$                    | OSS                      | -      | -           | -       | -       | -       | -                         | - <sup>d</sup>    |
|                                                                                   | CSS                      | -      | -4303.20524 | 0.96311 | 1.02427 | 0.86920 | -4302.33604               | -14.2             |
|                                                                                   | Triplet                  | 2.0296 | -4303.19337 | 0.95934 | 1.02195 | 0.86108 | -4302.33229               | -11.8             |
| $(t\text{BuNH}_2)_2$<br>$[\text{Co}^{\text{III}}(\text{DPP}^{3-})]$               | OSS                      | -      | -           | -       | -       | -       | -                         | - <sup>d</sup>    |
|                                                                                   | CSS                      | -      | -4234.25710 | 1.08343 | 1.14921 | 0.98489 | -4233.27221               | -17.0             |
|                                                                                   | Triplet                  | 2.0269 | -4234.24621 | 1.07951 | 1.14560 | 0.98040 | -4233.26581               | -13.0             |
| $[\text{Co}^{\text{II}}(\text{DPP}^{2-})]$<br>$\bullet\text{CH}_2\text{Cl}_2$     | OSS                      | 1.0327 | -4766.31252 | 0.80814 | 0.86476 | 0.71639 | -4765.594695 <sup>b</sup> |                   |
|                                                                                   | OSS/Triplet <sup>c</sup> | 2.0331 | -4766.31379 | 0.80814 | 0.86476 | 0.71627 | -4765.59752               |                   |
| $[\text{Co}^{\text{II}}(\text{DPP}^{2-})]$<br>$\bullet(\text{CH}_2\text{Cl}_2)_2$ | OSS                      | 1.0334 | -5725.94574 | 0.83812 | 0.90032 | 0.73666 | -5725.207468 <sup>b</sup> |                   |
|                                                                                   | OSS/Triplet <sup>c</sup> | 2.0336 | -5725.94717 | 0.83812 | 0.90032 | 0.73653 | -5725.21064               |                   |
| <b>THF</b>                                                                        | CSS                      | -      | -232.40289  | 0.11614 | 0.12195 | 0.08876 | -232.31413                | -                 |
| <b>Pyridine (Py)</b>                                                              | CSS                      | -      | -248.22806  | 0.08861 | 0.09382 | 0.06188 | -248.16617                | -                 |
| <b><i>t</i>BuNH<sub>2</sub></b>                                                   | CSS                      | -      | -213.75116  | 0.14795 | 0.15551 | 0.11917 | -213.63199                | -                 |
| <b>CH<sub>2</sub>Cl<sub>2</sub></b>                                               | CSS                      | -      | -959.61828  | 0.02899 | 0.03352 | 0.00281 | -959.61547                | -                 |

Geometry optimizations and frequency analysis were performed at the B3LYP/def2-SVP/disp3/m4-grid level of theory. A single point energy SCF calculation at the B3LYP/def2-TZVP/disp3/m4-grid level of theory was then performed for final energy evaluation, wherein the previously calculated vibrations were used. Conversion from Hartree to kcal mol<sup>-1</sup> can be achieved by multiplication with 627.503. <sup>a</sup> Although the energy for this OSS species is slightly (1.3 kcal mol<sup>-1</sup>) higher in energy than the triplet, CASSCF calculations demonstrated that the BSS-state is the most stable (which is approximated by the DFT OSS solution). <sup>b</sup> Calculated from the approximate correction formula for the OSS as described in the general considerations. <sup>c</sup> SCF at the triplet spin state on the converged geometry for the OSS spin state. <sup>d</sup> The OSS spin state could not be found and consequently converged to the CSS solution, even when starting from orbitals and a geometry first optimized at the triplet spin state.

The formation energies of  $[\text{Co}^{\text{II}}(\text{DPP}^{2-})(\text{THF})]$  and  $[\text{Co}^{\text{II}}(\text{DPP}^{2-})(\text{THF})_2]$  are overestimated by the DFT calculations due to over-estimation of the dispersion corrections. We therefore exchanged  $\text{CH}_2\text{Cl}_2$  (in  $[\text{Co}^{\text{II}}(\text{DPP}^{2-})]\cdot\text{CH}_2\text{Cl}_2$  and  $[\text{Co}^{\text{II}}(\text{DPP}^{2-})]\cdot(\text{CH}_2\text{Cl}_2)_2$ ) for THF. However, this results in an erroneous cancelation of all translational entropy contributions to the calculated free energies because the translational entropy contributions to substrate/product association/dissociation are fully counterbalanced by the translational entropy contributions resulting from dissociation/association of the  $\text{CH}_2\text{Cl}_2$  solvent molecule. This is not accurate for solution phase reactions, wherein the translational entropy contributions associated with substrate/product association/dissociation steps cannot be neglected. As the complexes in solution are completely surrounded by solvent molecules, these solvent association/dissociation steps lead to only small contributions to the translational entropy. These steps are of little influence on the THF association/dissociation steps and therefore the latter are not cancelled by the former in solution. Therefore, we applied a +6.0 or +7.5 kcal mol<sup>-1</sup> correction term (corresponding to the translational entropy contribution) to the calculated free energies of all substrate/product association/dissociation steps. The results are summarized in Table S9. The (nearly) thermoneutral formation energies are consistent with the observed weak binding of THF.

Table S9. Corrected formation energies for  $[\text{Co}^{\text{II}}(\text{DPP}^{2-})(\text{THF})]$  and  $[\text{Co}^{\text{II}}(\text{DPP}^{2-})(\text{THF})_2]$ .

| Correction (kcal mol <sup>-1</sup> ) | Formation of $[\text{Co}^{\text{II}}(\text{DPP}^{2-})(\text{THF})]$ | Formation of $[\text{Co}^{\text{II}}(\text{DPP}^{2-})(\text{THF})_2]$ |
|--------------------------------------|---------------------------------------------------------------------|-----------------------------------------------------------------------|
| +6.0                                 | -0.7 kcal mol <sup>-1</sup>                                         | -1.2 kcal mol <sup>-1</sup>                                           |
| +7.5                                 | +0.9 kcal mol <sup>-1</sup>                                         | +1.8 kcal mol <sup>-1</sup>                                           |

The experimental determination of the super exchange coupling constants, to determine the coupling magnitude between the unpaired electrons in the mono- and bis-THF adducts is unfortunately not possible because these species only exist in solution (where even the mono-THF adduct is not obtained as a pure intermediate, but as a mixture with  $[\text{Co}^{\text{II}}(\text{DPP}^{2-})]$  and  $[\text{Co}^{\text{II}}(\text{DPP}^{2-})(\text{THF})_2]$  according to the UV-Vis titration study). Moreover, the large NEVPT2-CASSCF calculated energy differences (*vide supra*) between the singlet, triplet and quintet spin states for  $[\text{Co}^{\text{II}}(\text{DPP}^{2-})(\text{THF})_2]$  imply that experimental measurement of the coupling constant would require SQUID measurements at elevated temperatures, which is unfeasible due to the use of THF as solvent. However, the super exchange coupling constants<sup>26</sup> ( $J = -\frac{E_{\text{Triplet}} - E_{\text{OSS}}}{\langle S^2_{\text{triplet}} \rangle - \langle S^2_{\text{OSS}} \rangle}$ ) of  $[\text{Co}^{\text{II}}(\text{DPP}^{2-})(\text{THF})]$  and  $[\text{Co}^{\text{II}}(\text{DPP}^{2-})(\text{THF})_2]$  were calculated with DFT (see Table S8 for energies and  $\langle S^2 \rangle$  values). We chose DFT for these calculations because single root NEVPT2-CASSCF state averaged (50:50 singlet:triplet ratio) calculations with the employed active spaces proved to be too computationally demanding in terms of memory usage. The DFT calculated  $J$  values were found to be 816 cm<sup>-1</sup> ( $[\text{Co}^{\text{II}}(\text{DPP}^{2-})(\text{THF})]$ ) and 2140 cm<sup>-1</sup> ( $[\text{Co}^{\text{II}}(\text{DPP}^{2-})(\text{THF})_2]$ ) and clearly reflect the stronger ferromagnetic coupling within the bis-THF adduct, as was also inferred based on the relative stabilities of the singlet, triplet and quintet spin states obtained from NEVPT2-CASSCF calculations (*vide supra*). In addition, the positive sign of the calculated  $J$  values is (as expected) consistent with ferromagnetic coupling.

*Coordinates (xyz) for the most stable spin state of the calculated structures.*

Geometries were optimized at the B3LYP/def2-SVP/m4/disp3 level of theory.

| <b>[Co<sup>II</sup>(DPP<sup>2-</sup>)] (BSS/OSS)</b> |            |            |            |   |            |            |            |
|------------------------------------------------------|------------|------------|------------|---|------------|------------|------------|
| 97 atoms                                             |            |            |            | C | 14.2879990 | 1.8260576  | -0.6721206 |
| Co                                                   | 9.5047922  | 6.5850587  | 1.7298959  | C | 7.8533346  | 10.9031663 | -3.6044570 |
| O                                                    | 10.5904076 | 5.0975803  | 2.1708129  | F | 8.0481751  | 12.2120662 | -3.7333308 |
| O                                                    | 9.2417878  | 6.7725029  | 3.5953948  | C | 4.6315735  | 10.5833192 | 6.1115962  |
| N                                                    | 8.2105994  | 7.9522464  | 1.3908842  | H | 5.0817669  | 11.3454246 | 5.4555928  |
| C                                                    | 10.9986942 | 5.6288501  | -0.6107119 | H | 3.9697154  | 11.1062757 | 6.8199593  |
| N                                                    | 10.0236637 | 6.4447108  | -0.1059657 | H | 4.0011361  | 9.9241763  | 5.4936212  |
| C                                                    | 7.8638592  | 8.4608321  | 0.1551276  | C | 7.2369010  | 10.1855262 | -4.6337124 |
| H                                                    | 8.7732089  | 6.5323346  | 8.4520250  | F | 6.8433485  | 10.8108140 | -5.7361061 |
| H                                                    | 10.5246836 | 6.2562709  | 8.4106556  | C | 15.6165844 | 1.8616907  | 0.1190854  |
| C                                                    | 11.3790172 | 4.3383504  | 1.4937876  | H | 16.0161403 | 2.8873973  | 0.1679980  |
| C                                                    | 7.3850560  | 8.5316705  | 2.3149464  | H | 16.3713029 | 1.2212954  | -0.3671591 |
| C                                                    | 9.5590106  | 7.2219432  | -1.1481614 | H | 15.4912534 | 1.5008359  | 1.1517404  |
| C                                                    | 11.6852753 | 4.6029241  | 0.1052151  | C | 12.1741138 | 3.9411143  | 4.4937059  |
| C                                                    | 10.2917239 | 6.9031224  | -2.3478492 | H | 13.2621352 | 4.0686084  | 4.3698140  |
| H                                                    | 10.1451943 | 7.3677535  | -3.3200794 | H | 11.9796252 | 3.6990909  | 5.5501650  |
| C                                                    | 8.4698543  | 7.5068565  | 4.3174720  | H | 11.6830512 | 4.8909559  | 4.2614403  |
| C                                                    | 12.6411207 | 3.7944657  | -0.5756668 | C | 10.1361837 | 2.6019472  | 3.7384997  |
| H                                                    | 12.8751445 | 4.0374801  | -1.6083252 | H | 9.5741534  | 3.4951158  | 3.4422698  |
| C                                                    | 11.9872668 | 3.1752384  | 2.1196526  | H | 9.8925863  | 2.3720958  | 4.7883318  |
| C                                                    | 11.1802349 | 5.9219511  | -2.0194902 | H | 9.7983027  | 1.7555810  | 3.1177687  |
| H                                                    | 11.8878820 | 5.4376601  | -2.6863461 | C | 11.0873265 | 7.0764854  | 5.9165388  |
| C                                                    | 12.8838438 | 2.4344185  | 1.3771562  | H | 11.1539040 | 6.9622546  | 4.8284580  |
| H                                                    | 13.3501116 | 1.5706998  | 1.8471122  | H | 11.8715055 | 6.4550045  | 6.3782974  |
| C                                                    | 8.0745357  | 8.8544213  | -2.2868035 | H | 11.2945476 | 8.1293512  | 6.1699654  |
| C                                                    | 6.5595654  | 9.0742738  | 4.5707382  | C | 7.0355051  | 8.8085323  | -4.5005006 |
| H                                                    | 5.7886772  | 9.6784223  | 4.1005743  | F | 6.4454084  | 8.1272301  | -5.4779435 |
| C                                                    | 6.7569946  | 9.3720111  | 0.3049617  | C | 12.3494074 | 1.5024558  | 4.0181198  |
| H                                                    | 6.2690762  | 9.9121253  | -0.5030188 | H | 12.0460082 | 0.6432033  | 3.3982711  |
| C                                                    | 8.6027823  | 7.5014068  | 5.7654338  | H | 12.0637912 | 1.2772697  | 5.0577829  |
| C                                                    | 6.4592504  | 9.4170418  | 1.6350781  | H | 13.4482650 | 1.5790221  | 3.9911961  |
| H                                                    | 5.6818421  | 10.0117391 | 2.1062384  | C | 13.7577395 | 0.3739846  | -0.7230364 |
| C                                                    | 8.5155457  | 8.1525515  | -1.0471186 | H | 13.5736091 | -0.0331239 | 0.2832319  |
| C                                                    | 11.6611067 | 2.8087206  | 3.5768421  | H | 14.4890715 | -0.2855076 | -1.2193760 |
| C                                                    | 7.7032765  | 8.2452249  | 6.5013385  | H | 12.8112435 | 0.3220425  | -1.2847875 |
| H                                                    | 7.7918973  | 8.2324637  | 7.5859142  | C | 6.5150297  | 10.7850113 | 7.7433453  |
| C                                                    | 6.6514651  | 9.0324137  | 5.9430079  | H | 7.2729382  | 10.2745978 | 8.3574528  |
| C                                                    | 5.7012641  | 9.7903816  | 6.8828159  | H | 5.8489020  | 11.3357837 | 8.4282227  |
| C                                                    | 13.2546752 | 2.7214315  | 0.0288871  | H | 7.0362352  | 11.5183312 | 7.1072090  |
| C                                                    | 7.4581463  | 8.3565537  | 3.7292600  | C | 4.9825163  | 8.7790803  | 7.8063133  |
| C                                                    | 8.2640224  | 10.2339734 | -2.4486729 | H | 4.3931926  | 8.0593584  | 7.2157492  |
| F                                                    | 8.8509509  | 10.9426798 | -1.4863097 | H | 4.2970616  | 9.3040186  | 8.4924958  |
| C                                                    | 14.5730625 | 2.2861213  | -2.1126658 | H | 5.6932793  | 8.2059086  | 8.4215932  |
| H                                                    | 13.6677636 | 2.2516461  | -2.7396381 | C | 9.4100741  | 5.1691111  | 6.1732194  |
| H                                                    | 15.3213728 | 1.6239158  | -2.5762349 | H | 8.4178124  | 4.8912615  | 6.5652057  |
| H                                                    | 14.9746127 | 3.3116804  | -2.1415401 | H | 10.1603750 | 4.5355531  | 6.6714967  |
| C                                                    | 7.4534783  | 8.1610440  | -3.3349547 | H | 9.4341149  | 4.9536980  | 5.1007258  |
| F                                                    | 7.2457793  | 6.8496619  | -3.2346294 | C | 9.7118854  | 6.8602450  | 7.9772132  |
| C                                                    | 9.6946996  | 6.6621611  | 6.4490478  | H | 9.8945924  | 7.9102944  | 8.2577440  |

**[Co<sup>II</sup>(DPP<sup>2-</sup>)(THF)] (Triplet)**

110 atoms

|   |            |            |            |    |            |            |            |
|---|------------|------------|------------|----|------------|------------|------------|
| O | 10.6232323 | 5.1133047  | 2.0707022  | C  | 4.4777167  | 10.4243987 | 5.9815870  |
| O | 9.2334949  | 6.7870106  | 3.4862402  | H  | 4.8726450  | 11.1950659 | 5.3004926  |
| N | 8.1236381  | 7.8727642  | 1.2683360  | H  | 3.7952763  | 10.9245070 | 6.6869169  |
| C | 10.8281984 | 5.4567951  | -0.7648817 | H  | 3.8800622  | 9.7138422  | 5.3887494  |
| N | 9.8810688  | 6.2949289  | -0.2531797 | C  | 7.2964826  | 10.3000457 | -4.6778972 |
| C | 7.7742594  | 8.3716485  | 0.0315724  | F  | 6.9515862  | 10.9969193 | -5.7540364 |
| H | 8.9420443  | 6.7262197  | 8.3607398  | C  | 15.4801900 | 1.7221752  | -0.1798727 |
| H | 10.7068177 | 6.5766181  | 8.2661803  | H  | 15.8737027 | 2.7471513  | -0.2743010 |
| C | 11.3624093 | 4.3053741  | 1.3903748  | H  | 16.1839697 | 1.0363992  | -0.6805748 |
| C | 7.2903927  | 8.4458490  | 2.1887752  | H  | 15.4697262 | 1.4638665  | 0.8902709  |
| C | 9.4233563  | 7.0812459  | -1.2895333 | C  | 12.3694844 | 4.2225540  | 4.3357462  |
| C | 11.5462623 | 4.4572071  | -0.0327406 | H  | 13.4288602 | 4.4161928  | 4.0982045  |
| C | 10.1189993 | 6.7281782  | -2.5007866 | H  | 12.2913776 | 4.0604902  | 5.4221989  |
| H | 9.9676520  | 7.1870406  | -3.4751602 | H  | 11.7830306 | 5.1091331  | 4.0774634  |
| C | 8.4442288  | 7.5117445  | 4.2000016  | C  | 10.3753756 | 2.7001530  | 3.8599671  |
| C | 12.4323648 | 3.5876752  | -0.7282584 | H  | 9.7379275  | 3.5242841  | 3.5184700  |
| H | 12.5555326 | 3.7317378  | -1.7979917 | H  | 10.2164282 | 2.5640620  | 4.9417945  |
| C | 12.0539082 | 3.2155713  | 2.0579560  | H  | 10.0545733 | 1.7771913  | 3.3495228  |
| C | 10.9830855 | 5.7204016  | -2.1809776 | C  | 11.1198185 | 7.3277628  | 5.7201503  |
| H | 11.6631305 | 5.2094638  | -2.8567170 | H  | 11.1425566 | 7.1871371  | 4.6336241  |
| C | 12.8886851 | 2.4139684  | 1.3041136  | H  | 11.9646775 | 6.7744341  | 6.1608887  |
| H | 13.4156221 | 1.6042720  | 1.8051555  | H  | 11.2643818 | 8.3992492  | 5.9385233  |
| C | 8.0290349  | 8.8174310  | -2.3886043 | C  | 7.0014651  | 8.9356891  | -4.6035196 |
| C | 6.4700201  | 8.9923451  | 4.4473552  | F  | 6.3711400  | 8.3382369  | -5.6107529 |
| H | 5.6604554  | 9.5413680  | 3.9742587  | C  | 12.6727201 | 1.7668120  | 4.0718780  |
| C | 6.6609802  | 9.2727535  | 0.1761819  | H  | 12.3735667 | 0.8312509  | 3.5726359  |
| H | 6.1678210  | 9.8032944  | -0.6354208 | H  | 12.4908594 | 1.6367704  | 5.1504696  |
| C | 8.6115813  | 7.5684508  | 5.6435125  | H  | 13.7580499 | 1.9006606  | 3.9357849  |
| C | 6.3530548  | 9.3120872  | 1.5068594  | C  | 13.5564280 | 0.1624038  | -0.6700403 |
| H | 5.5644312  | 9.8950902  | 1.9740713  | H  | 13.4864008 | -0.1464793 | 0.3844374  |
| C | 8.4213057  | 8.0525545  | -1.1706704 | H  | 14.2356134 | -0.5421881 | -1.1785014 |
| C | 11.8682250 | 2.9796746  | 3.5657956  | H  | 12.5549901 | 0.0582613  | -1.1174677 |
| C | 7.6879830  | 8.2838882  | 6.3793010  | C  | 6.3668501  | 10.7785296 | 7.5794140  |
| H | 7.8036697  | 8.3146621  | 7.4610871  | H  | 7.1617697  | 10.3299876 | 8.1950990  |
| C | 6.5832230  | 8.9904326  | 5.8203950  | H  | 5.6783736  | 11.3066776 | 8.2601067  |
| C | 5.6031032  | 9.7157155  | 6.7555731  | H  | 6.8349609  | 11.5247612 | 6.9174836  |
| C | 13.1135427 | 2.5716360  | -0.0939425 | C  | 4.9580834  | 8.6879928  | 7.7145114  |
| C | 7.3891560  | 8.3007295  | 3.6090689  | H  | 4.4044963  | 7.9202357  | 7.1505875  |
| C | 8.3131674  | 10.1864612 | -2.4913843 | H  | 4.2523788  | 9.1881975  | 8.3987158  |
| F | 8.9465269  | 10.8123550 | -1.4988985 | H  | 5.7106160  | 8.1730055  | 8.3315029  |
| C | 14.1976870 | 1.9321035  | -2.3149713 | C  | 9.6017387  | 5.3180280  | 6.1151884  |
| H | 13.2300601 | 1.8401740  | -2.8335098 | H  | 8.6497241  | 4.9826965  | 6.5582622  |
| H | 14.8969657 | 1.2271504  | -2.7918820 | H  | 10.4174716 | 4.7617174  | 6.6032058  |
| H | 14.5846907 | 2.9495321  | -2.4851080 | H  | 9.5981304  | 5.0656148  | 5.0511710  |
| C | 7.3686851  | 8.2119699  | -3.4655469 | C  | 9.8371491  | 7.1010890  | 7.8392647  |
| F | 7.0716378  | 6.9149984  | -3.4212456 | H  | 9.9497372  | 8.1727130  | 8.0707837  |
| C | 9.7809236  | 6.8370274  | 6.3223965  | Co | 9.5095281  | 6.5839345  | 1.6135154  |
| C | 14.0741124 | 1.6125536  | -0.8147026 | O  | 11.1080355 | 8.0557775  | 1.6599602  |
| C | 7.9557619  | 10.9304078 | -3.6182462 | C  | 12.4733144 | 7.6431931  | 1.8255680  |
| F | 8.2409414  | 12.2276020 | -3.6921654 | C  | 13.2456412 | 8.9439343  | 2.0288604  |
|   |            |            |            | C  | 12.2243254 | 9.7932607  | 2.8011682  |
|   |            |            |            | C  | 10.9026481 | 9.3956954  | 2.1402702  |



|   |            |            |           |
|---|------------|------------|-----------|
| H | 12.7675714 | 7.0721998  | 0.9323175 |
| H | 12.5471681 | 6.9757610  | 2.7009788 |
| H | 14.1912506 | 8.7954440  | 2.5713927 |
| H | 13.4767698 | 9.4084363  | 1.0556361 |
| H | 12.4177308 | 10.8747175 | 2.7438342 |
| H | 12.2173405 | 9.5020418  | 3.8637105 |
| H | 10.6503202 | 10.0373026 | 1.2775939 |
| H | 10.0486630 | 9.3951552  | 2.8336067 |

**[Co<sup>II</sup>(DPP<sup>2-</sup>)(THF)<sub>2</sub>] (Triplet)**

123 atoms

|   |            |            |            |
|---|------------|------------|------------|
| O | 10.5738492 | 5.1838926  | 2.2771109  |
| O | 9.1370624  | 6.7734110  | 3.7588619  |
| N | 8.1190251  | 8.0410450  | 1.5862515  |
| C | 10.8612993 | 5.7125391  | -0.5250646 |
| N | 9.8946293  | 6.5124756  | 0.0135529  |
| C | 7.7200597  | 8.5210077  | 0.3565982  |
| H | 8.8498063  | 6.5221576  | 8.6050318  |
| H | 10.6005634 | 6.2453348  | 8.5104072  |
| C | 11.3245606 | 4.4151817  | 1.5629257  |
| C | 7.3120288  | 8.6077741  | 2.5280273  |
| C | 9.4016846  | 7.3059100  | -1.0013371 |
| C | 11.5608218 | 4.6655132  | 0.1647095  |
| C | 10.1103477 | 7.0162579  | -2.2182605 |
| H | 9.9423880  | 7.4982515  | -3.1790664 |
| C | 8.4292705  | 7.5535053  | 4.5001549  |
| C | 12.4694656 | 3.8429539  | -0.5560395 |
| H | 12.6409753 | 4.0687890  | -1.6049729 |
| C | 11.9649363 | 3.2617300  | 2.1688627  |
| C | 11.0160888 | 6.0322396  | -1.9256675 |
| H | 11.7148061 | 5.5674666  | -2.6156716 |
| C | 12.8242051 | 2.5060743  | 1.3931387  |
| H | 13.3135443 | 1.6485165  | 1.8512750  |
| C | 7.8749396  | 8.9290577  | -2.0803276 |
| C | 6.6019386  | 9.1957275  | 4.8142469  |
| H | 5.8510925  | 9.8415341  | 4.3670506  |
| C | 6.6016044  | 9.4097769  | 0.5323733  |
| H | 6.0733704  | 9.9276134  | -0.2654866 |
| C | 8.6071138  | 7.5421589  | 5.9421981  |
| C | 6.3448771  | 9.4628452  | 1.8740531  |
| H | 5.5658837  | 10.0401937 | 2.3641524  |
| C | 8.3465972  | 8.2183143  | -0.8582300 |
| C | 11.6947673 | 2.9083655  | 3.6402780  |
| C | 7.7588787  | 8.3145834  | 6.7120238  |
| H | 7.8828095  | 8.2956474  | 7.7932574  |
| C | 6.7273957  | 9.1439197  | 6.1865999  |
| C | 5.8349448  | 9.9400507  | 7.1522952  |
| C | 13.1167673 | 2.7730240  | 0.0262831  |
| C | 7.4397682  | 8.4427295  | 3.9462716  |
| C | 8.1013427  | 10.3009861 | -2.2498547 |
| F | 8.7550236  | 10.9887855 | -1.3128705 |
| C | 14.2925395 | 2.2989941  | -2.1900925 |

|   |            |            |            |
|---|------------|------------|------------|
| H | 13.3466676 | 2.2489469  | -2.7527730 |
| H | 15.0113329 | 1.6302004  | -2.6899034 |
| H | 14.6853338 | 3.3253965  | -2.2675506 |
| C | 7.1957961  | 8.2529342  | -3.1017964 |
| F | 6.9531909  | 6.9475795  | -2.9900765 |
| C | 9.7142533  | 6.6887221  | 6.5812191  |
| C | 14.1073962 | 1.8682949  | -0.7242763 |
| C | 7.6686681  | 10.9829743 | -3.3897633 |
| F | 7.9006681  | 12.2853387 | -3.5300202 |
| C | 4.7807169  | 10.7807616 | 6.4107887  |
| H | 5.2463274  | 11.5253156 | 5.7455675  |
| H | 4.1590351  | 11.3284942 | 7.1369299  |
| H | 4.1084934  | 10.1512133 | 5.8062054  |
| C | 6.9902834  | 10.2838349 | -4.3926875 |
| F | 6.5735866  | 10.9210792 | -5.4805918 |
| C | 15.4855660 | 1.9284833  | -0.0250085 |
| H | 15.8799747 | 2.9574125  | -0.0264175 |
| H | 16.2118154 | 1.2808931  | -0.5445027 |
| H | 15.4295607 | 1.5925396  | 1.0220246  |
| C | 12.2105844 | 4.0582206  | 4.5335466  |
| H | 13.2903885 | 4.2109149  | 4.3708513  |
| H | 12.0591333 | 3.8194569  | 5.5979165  |
| H | 11.6870668 | 4.9927454  | 4.3117423  |
| C | 10.1772281 | 2.6835987  | 3.8423353  |
| H | 9.6045070  | 3.5668199  | 3.5382417  |
| H | 9.9555189  | 2.4711674  | 4.9004790  |
| H | 9.8383255  | 1.8219754  | 3.2432435  |
| C | 11.0852130 | 7.1265655  | 6.0108485  |
| H | 11.0984035 | 7.0717109  | 4.9159648  |
| H | 11.8885788 | 6.4838377  | 6.4055615  |
| H | 11.3033062 | 8.1660738  | 6.3066083  |
| C | 6.7521612  | 8.9134030  | -4.2506182 |
| F | 6.1038564  | 8.2512193  | -5.2048403 |
| C | 12.4144848 | 1.6181991  | 4.0766326  |
| H | 12.1040419 | 0.7463399  | 3.4784374  |
| H | 12.1669293 | 1.4030094  | 5.1283048  |
| H | 13.5104417 | 1.7102974  | 4.0105027  |
| C | 13.5885620 | 0.4114899  | -0.7114433 |
| H | 13.4768469 | 0.0235376  | 0.3128517  |
| H | 14.2896367 | -0.2530990 | -1.2438050 |
| H | 12.6063339 | 0.3416717  | -1.2059910 |
| C | 6.7101361  | 10.8969597 | 7.9949681  |
| H | 7.4604330  | 10.3524707 | 8.5887237  |
| H | 6.0853641  | 11.4741885 | 8.6971090  |
| H | 7.2467943  | 11.6087428 | 7.3472664  |
| C | 5.0964544  | 8.9585302  | 8.0920093  |
| H | 4.4606062  | 8.2680437  | 7.5148080  |
| H | 4.4530374  | 9.5096255  | 8.7984122  |
| H | 5.7978840  | 8.3515111  | 8.6851394  |
| C | 9.4363372  | 5.1976605  | 6.2888280  |
| H | 8.4480947  | 4.9092475  | 6.6841376  |
| H | 10.1930317 | 4.5608924  | 6.7736529  |

|    |            |            |            |
|----|------------|------------|------------|
| H  | 9.4563200  | 4.9982362  | 5.2139278  |
| C  | 9.7761361  | 6.8576431  | 8.1114392  |
| H  | 9.9674183  | 7.9016837  | 8.4072947  |
| Co | 9.4208522  | 6.6471585  | 1.8833985  |
| O  | 11.1105061 | 8.1311312  | 2.1598334  |
| C  | 12.4603226 | 7.6415512  | 2.1900991  |
| C  | 13.3319584 | 8.8805351  | 2.0046493  |
| C  | 12.4671989 | 9.7168720  | 1.0516297  |
| C  | 11.0572794 | 9.4474063  | 1.5816284  |
| H  | 12.6052848 | 6.9223138  | 1.3658009  |
| H  | 12.6137033 | 7.1110100  | 3.1403726  |
| H  | 13.4642992 | 9.4052269  | 2.9657486  |
| H  | 14.3285414 | 8.6421981  | 1.6032394  |
| H  | 12.5623211 | 9.3360879  | 0.0209419  |
| H  | 12.7207048 | 10.7875079 | 1.0444537  |
| H  | 10.2873899 | 9.4658598  | 0.7977766  |
| H  | 10.7654541 | 10.1637938 | 2.3701464  |
| O  | 7.7480074  | 5.1589322  | 1.6501505  |
| C  | 6.9373546  | 4.7395468  | 2.7613924  |
| C  | 6.5800481  | 3.2778916  | 2.4774694  |
| C  | 6.6312121  | 3.2207870  | 0.9435031  |
| C  | 7.8129852  | 4.1402042  | 0.6434435  |
| H  | 6.0442815  | 5.3881297  | 2.8034750  |
| H  | 7.5118145  | 4.8812452  | 3.6873702  |
| H  | 7.3455762  | 2.6112326  | 2.9058958  |
| H  | 5.6042608  | 2.9908849  | 2.8972049  |
| H  | 5.7053013  | 3.6347259  | 0.5097979  |
| H  | 6.7714245  | 2.2042858  | 0.5455406  |
| H  | 7.7702626  | 4.6280992  | -0.3417083 |
| H  | 8.7763193  | 3.6050421  | 0.7252424  |

**[Co<sup>II</sup>(DPP<sup>2-</sup>)(Py)] (Triplet)**

108 atoms

|   |            |           |            |
|---|------------|-----------|------------|
| O | 10.5079136 | 5.0069327 | 2.1849959  |
| O | 9.1429371  | 6.6833793 | 3.6234494  |
| N | 8.1663419  | 7.9237916 | 1.4062490  |
| C | 10.8516712 | 5.4925667 | -0.6208921 |
| N | 9.8719688  | 6.2980543 | -0.1176339 |
| C | 7.7716020  | 8.3815600 | 0.1642856  |
| H | 8.1167278  | 6.0378401 | 8.3135627  |
| H | 9.8149546  | 5.5373934 | 8.4592809  |
| C | 11.3395960 | 4.2857863 | 1.5126276  |
| C | 7.4248068  | 8.5909669 | 2.3398234  |
| C | 9.3410368  | 7.0098707 | -1.1729119 |
| C | 11.6376196 | 4.5588085 | 0.1279059  |
| C | 10.0057050 | 6.6250483 | -2.3912698 |
| H | 9.7870215  | 7.0156356 | -3.3825953 |
| C | 8.4019653  | 7.4511385 | 4.3453055  |
| C | 12.6811914 | 3.8460822 | -0.5253287 |
| H | 12.9208259 | 4.1182517 | -1.5498292 |
| C | 12.0083984 | 3.1595546 | 2.1423363  |
| C | 10.9418334 | 5.6893219 | -2.0522368 |

|   |            |            |            |
|---|------------|------------|------------|
| H | 11.6129650 | 5.1662368  | -2.7277793 |
| C | 12.9977001 | 2.5089628  | 1.4297418  |
| H | 13.5233928 | 1.6869863  | 1.9119811  |
| C | 7.8920932  | 8.6788078  | -2.2926976 |
| C | 6.7497752  | 9.2855244  | 4.6000245  |
| H | 6.1222463  | 10.0367098 | 4.1287871  |
| C | 6.7267306  | 9.3573627  | 0.3248950  |
| H | 6.2123254  | 9.8715252  | -0.4840393 |
| C | 8.4206580  | 7.3327348  | 5.7963527  |
| C | 6.5108027  | 9.4891730  | 1.6676390  |
| H | 5.7792684  | 10.1339292 | 2.1462382  |
| C | 8.3399753  | 7.9820782  | -1.0529279 |
| C | 11.6398807 | 2.7267880  | 3.5712226  |
| C | 7.6231350  | 8.1859001  | 6.5327880  |
| H | 7.6423810  | 8.1002091  | 7.6174369  |
| C | 6.7771410  | 9.1859142  | 5.9735610  |
| C | 5.9589387  | 10.0893543 | 6.9093106  |
| C | 13.3885749 | 2.8427995  | 0.1011896  |
| C | 7.5299844  | 8.4425815  | 3.7600093  |
| C | 8.2171415  | 10.0236615 | -2.5134656 |
| F | 8.9314067  | 10.6939529 | -1.6064382 |
| C | 14.8206617 | 2.5642169  | -1.9931348 |
| H | 13.9469672 | 2.4165169  | -2.6477415 |
| H | 15.6597937 | 1.9977037  | -2.4273282 |
| H | 15.0928621 | 3.6314851  | -2.0175352 |
| C | 7.1536406  | 8.0203397  | -3.2839955 |
| F | 6.8214321  | 6.7411260  | -3.1273624 |
| C | 9.3290561  | 6.3046817  | 6.4905534  |
| C | 14.5469041 | 2.0782829  | -0.5589283 |
| C | 7.8234214  | 10.6965477 | -3.6722863 |
| F | 8.1505739  | 11.9722749 | -3.8602661 |
| C | 5.1162771  | 11.1175872 | 6.1344794  |
| H | 5.7465464  | 11.7883566 | 5.5290216  |
| H | 4.5473391  | 11.7439985 | 6.8398046  |
| H | 4.3901564  | 10.6293217 | 5.4651758  |
| C | 7.0854939  | 10.0149475 | -4.6450696 |
| F | 6.7071082  | 10.6425060 | -5.7521860 |
| C | 15.8327066 | 2.2852779  | 0.2755610  |
| H | 16.0979804 | 3.3536399  | 0.3263143  |
| H | 16.6791318 | 1.7416897  | -0.1768013 |
| H | 15.7153543 | 1.9196530  | 1.3075185  |
| C | 11.9923497 | 3.8670659  | 4.5491298  |
| H | 13.0663561 | 4.1101204  | 4.4869983  |
| H | 11.7716584 | 3.5708458  | 5.5866208  |
| H | 11.4116083 | 4.7643522  | 4.3212162  |
| C | 10.1306293 | 2.3924042  | 3.6365931  |
| H | 9.5159102  | 3.2442053  | 3.3225847  |
| H | 9.8437014  | 2.1209812  | 4.6654482  |
| H | 9.9007104  | 1.5364462  | 2.9811091  |
| C | 10.8016710 | 6.6786373  | 6.2025935  |
| H | 10.9912992 | 6.7309191  | 5.1252102  |
| H | 11.4859466 | 5.9355711  | 6.6424280  |

|    |            |            |            |   |            |            |            |
|----|------------|------------|------------|---|------------|------------|------------|
| H  | 11.0356367 | 7.6627716  | 6.6408260  | C | 10.0581321 | 6.5879260  | -2.3353708 |
| C  | 6.7480621  | 8.6721315  | -4.4521443 | H | 9.8640083  | 6.9911148  | -3.3271262 |
| F  | 6.0452905  | 8.0261996  | -5.3780129 | C | 8.5230801  | 7.4930012  | 4.4217556  |
| C  | 12.4105734 | 1.4703271  | 4.0195945  | C | 12.5639886 | 3.6450577  | -0.4965333 |
| H  | 12.2195671 | 0.6088705  | 3.3596954  | H | 12.7066598 | 3.8324139  | -1.5571924 |
| H  | 12.0849530 | 1.1890572  | 5.0336150  | C | 12.1570560 | 3.2051736  | 2.2552297  |
| H  | 13.4985636 | 1.6403374  | 4.0612248  | C | 10.9080447 | 5.5625321  | -1.9983415 |
| C  | 14.2083291 | 0.5705201  | -0.6154547 | H | 11.5188722 | 4.9795347  | -2.6814813 |
| H  | 14.0466238 | 0.1464792  | 0.3875619  | C | 13.0725943 | 2.4749138  | 1.5055773  |
| H  | 15.0327293 | 0.0078446  | -1.0846559 | H | 13.6438669 | 1.6981789  | 2.0097387  |
| H  | 13.2940101 | 0.3963615  | -1.2051175 | C | 8.1292198  | 8.8100279  | -2.2281547 |
| C  | 6.9186582  | 10.8596390 | 7.8462597  | C | 6.6589884  | 9.0985658  | 4.6350803  |
| H  | 7.5224950  | 10.1794983 | 8.4666772  | H | 5.9491076  | 9.7557540  | 4.1400426  |
| H  | 6.3496834  | 11.5141833 | 8.5275984  | C | 7.0578938  | 9.5923565  | 0.4006536  |
| H  | 7.6121084  | 11.4883542 | 7.2649159  | H | 6.6245594  | 10.1920898 | -0.3971122 |
| C  | 5.0023488  | 9.2187490  | 7.7568190  | C | 8.5169022  | 7.3746821  | 5.8635980  |
| H  | 4.3033512  | 8.6632720  | 7.1112383  | C | 6.7921460  | 9.6679273  | 1.7466008  |
| H  | 4.4113718  | 9.8496888  | 8.4416242  | H | 6.1079562  | 10.3576087 | 2.2324187  |
| H  | 5.5485141  | 8.4847814  | 8.3691998  | C | 8.5553154  | 8.1047878  | -0.9866568 |
| C  | 8.9912752  | 4.8852292  | 5.9817382  | C | 11.9536104 | 2.8800947  | 3.7488917  |
| H  | 7.9397095  | 4.6426245  | 6.2070700  | C | 7.5709185  | 8.0953253  | 6.5842632  |
| H  | 9.6249271  | 4.1367238  | 6.4830859  | H | 7.5622355  | 7.9896858  | 7.6671780  |
| H  | 9.1429921  | 4.7994542  | 4.9018797  | C | 6.6114291  | 8.9576564  | 6.0094547  |
| C  | 9.1472555  | 6.2961733  | 8.0210573  | C | 5.5950777  | 9.6817380  | 6.9086630  |
| H  | 9.4059461  | 7.2634441  | 8.4807502  | C | 13.3186428 | 2.6701691  | 0.1286152  |
| Co | 9.5060293  | 6.5788097  | 1.7549219  | C | 7.5970494  | 8.4063289  | 3.8287270  |
| N  | 11.2036030 | 7.9143892  | 1.9211683  | C | 8.6216632  | 10.0822383 | -2.5385427 |
| C  | 13.4138701 | 9.5931197  | 2.1312294  | F | 9.4912936  | 10.6776301 | -1.7191375 |
| C  | 12.2525885 | 7.5616762  | 2.6746317  | C | 14.4969008 | 2.1763207  | -2.0817764 |
| C  | 11.2334368 | 9.0798912  | 1.2623355  | H | 13.5491564 | 2.0146959  | -2.6198726 |
| C  | 12.3197385 | 9.9528091  | 1.3393475  | H | 15.2623505 | 1.5450803  | -2.5611387 |
| C  | 13.3805038 | 8.3725112  | 2.8103814  | H | 14.7967282 | 3.2270820  | -2.2228095 |
| H  | 12.1748407 | 6.5930166  | 3.1719389  | C | 7.2264746  | 8.2239229  | -3.1217539 |
| H  | 10.3566861 | 9.3153868  | 0.6529151  | F | 6.7246666  | 7.0144400  | -2.8638071 |
| H  | 12.3016454 | 10.8942260 | 0.7860379  | C | 9.5322612  | 6.4817215  | 6.6047836  |
| H  | 14.2131082 | 8.0460343  | 3.4371999  | C | 14.3747191 | 1.8139876  | -0.5909411 |
| H  | 14.2810928 | 10.2535370 | 2.2151675  | C | 8.2343579  | 10.7555580 | -3.6996685 |

**[Co<sup>III</sup>(DPP<sup>3-</sup>)(Py)<sub>2</sub>] (CSS)**

119 atoms

|   |            |           |            |   |            |            |            |
|---|------------|-----------|------------|---|------------|------------|------------|
| O | 10.5726227 | 4.9908021 | 2.2913571  | H | 5.1836369  | 11.3631082 | 5.5522380  |
| O | 9.3645949  | 6.7807129 | 3.7119409  | H | 3.9272887  | 11.0755722 | 6.7762081  |
| N | 8.3452375  | 8.0291426 | 1.4743160  | H | 4.0536590  | 9.9939310  | 5.3711170  |
| C | 10.8369298 | 5.3922362 | -0.5698020 | C | 7.3295221  | 10.1479438 | -4.5760533 |
| N | 9.9468300  | 6.2811261 | -0.0664071 | F | 6.9529025  | 10.7781970 | -5.6824832 |
| C | 8.0244397  | 8.5549806 | 0.2267321  | C | 15.7542837 | 2.0317904  | 0.0722819  |
| H | 8.3611671  | 6.1273179 | 8.4429823  | H | 16.0560858 | 3.0897146  | 0.0072728  |
| H | 10.1114631 | 5.8757561 | 8.6054141  | H | 16.5272383 | 1.4220755  | -0.4257976 |
| C | 11.4050265 | 4.2520631 | 1.5980013  | H | 15.7441965 | 1.7518502  | 1.1371369  |
| C | 7.5981077  | 8.6717798 | 2.4039825  | C | 12.2837150 | 4.1187308  | 4.6079809  |
| C | 9.4612021  | 7.0475302 | -1.1216406 | H | 13.3126258 | 4.4612746  | 4.4085352  |
| C | 11.6058060 | 4.4294924 | 0.1936130  | H | 12.2068042 | 3.8814567  | 5.6808021  |
|   |            |           |            | H | 11.5904163 | 4.9356031  | 4.3959532  |

|    |            |            |            |
|----|------------|------------|------------|
| C  | 10.4931540 | 2.4261201  | 3.9724039  |
| H  | 9.7893437  | 3.1732054  | 3.5934416  |
| H  | 10.2914458 | 2.2674809  | 5.0445371  |
| H  | 10.3039091 | 1.4784193  | 3.4424220  |
| C  | 10.9632350 | 6.9856401  | 6.3094980  |
| H  | 11.7145196 | 6.3142909  | 6.7568436  |
| H  | 11.1069900 | 7.9935892  | 6.7317422  |
| H  | 11.1441106 | 7.0400329  | 5.2319014  |
| C  | 6.8211381  | 8.8773103  | -4.2884033 |
| F  | 5.9572305  | 8.3046141  | -5.1219833 |
| C  | 12.8652906 | 1.7367322  | 4.2381269  |
| H  | 12.6866732 | 0.7967855  | 3.6926662  |
| H  | 12.6597198 | 1.5420455  | 5.3029673  |
| H  | 13.9339236 | 1.9902555  | 4.1498155  |
| C  | 13.9877537 | 0.3205727  | -0.4883709 |
| H  | 13.9234026 | -0.0145252 | 0.5585868  |
| H  | 14.7365432 | -0.3117286 | -0.9950808 |
| H  | 13.0081411 | 0.1380519  | -0.9587673 |
| C  | 6.3452873  | 10.5732567 | 7.9249318  |
| H  | 7.0179867  | 9.9841287  | 8.5672923  |
| H  | 5.6324421  | 11.0991360 | 8.5826755  |
| H  | 6.9557739  | 11.3292162 | 7.4052518  |
| C  | 4.7473573  | 8.6382357  | 7.6721980  |
| H  | 4.1963871  | 7.9929031  | 6.9690201  |
| H  | 4.0141156  | 9.1364095  | 8.3291386  |
| H  | 5.3724917  | 7.9877729  | 8.3034493  |
| C  | 9.3626351  | 5.0144117  | 6.1588897  |
| H  | 8.3281738  | 4.6761855  | 6.3355332  |
| H  | 10.0375407 | 4.3532254  | 6.7251209  |
| H  | 9.5965723  | 4.9011172  | 5.0979877  |
| C  | 9.3459955  | 6.5137576  | 8.1351317  |
| H  | 9.4643441  | 7.5275575  | 8.5489188  |
| Co | 9.5405029  | 6.5466425  | 1.8050935  |
| N  | 7.9532577  | 5.3547598  | 1.7350851  |
| C  | 5.7622190  | 3.6362479  | 1.7373640  |
| C  | 7.1724274  | 5.2505167  | 0.6471025  |
| C  | 7.6631878  | 4.6273587  | 2.8240515  |
| C  | 6.5760799  | 3.7563466  | 2.8647018  |
| C  | 6.0687074  | 4.4008279  | 0.6094565  |
| H  | 7.4370553  | 5.8613080  | -0.2136918 |
| H  | 8.3261909  | 4.7691292  | 3.6722031  |
| H  | 6.3839773  | 3.1861160  | 3.7753864  |
| H  | 5.4656407  | 4.3496004  | -0.2990303 |
| H  | 4.9027494  | 2.9609325  | 1.7370856  |
| N  | 11.1397848 | 7.7230730  | 1.9065636  |
| C  | 13.4157430 | 9.3106646  | 2.1454593  |
| C  | 12.1233338 | 7.3763023  | 2.7501122  |
| C  | 11.2666586 | 8.8416415  | 1.1737324  |
| C  | 12.3892003 | 9.6619881  | 1.2661928  |
| C  | 13.2770172 | 8.1438116  | 2.8984026  |
| H  | 11.9639877 | 6.4548093  | 3.3016680  |
| H  | 10.4509478 | 9.0872928  | 0.4971379  |

|   |            |            |           |
|---|------------|------------|-----------|
| H | 12.4441222 | 10.5614384 | 0.6500485 |
| H | 14.0472014 | 7.8178718  | 3.5998177 |
| H | 14.3081303 | 9.9347640  | 2.2396085 |

**[Co<sup>III</sup>(DPP<sup>3-</sup>)(*t*BuNH<sub>2</sub>)<sub>2</sub>] (CSS)**

129 atoms

|    |            |            |            |
|----|------------|------------|------------|
| Co | 9.3462153  | 6.6697331  | 1.9470832  |
| O  | 10.6988684 | 5.3849663  | 2.4163197  |
| O  | 9.0250524  | 6.7444917  | 3.8538672  |
| N  | 8.0013485  | 8.0303933  | 1.6397175  |
| C  | 10.6075868 | 5.5590218  | -0.4732432 |
| N  | 9.7503022  | 6.4598662  | 0.0696845  |
| C  | 7.7077519  | 8.6132834  | 0.4114099  |
| H  | 4.7664889  | 5.2441405  | 2.1478770  |
| N  | 8.1780003  | 5.0234802  | 1.9173273  |
| C  | 11.3762209 | 4.5292107  | 1.6871347  |
| C  | 7.2430238  | 8.6485735  | 2.5821002  |
| C  | 9.2151199  | 7.2147632  | -0.9679920 |
| C  | 11.3772604 | 4.5690903  | 0.2586912  |
| C  | 9.7830760  | 6.7737067  | -2.2010649 |
| H  | 9.5635219  | 7.1884172  | -3.1824574 |
| C  | 8.2236078  | 7.4889173  | 4.5831443  |
| C  | 12.1686171 | 3.6528928  | -0.4801772 |
| H  | 12.1386551 | 3.7123149  | -1.5646967 |
| C  | 12.1634096 | 3.5041810  | 2.3323519  |
| C  | 10.6430370 | 5.7444749  | -1.8993334 |
| H  | 11.2486146 | 5.1803486  | -2.6027364 |
| C  | 12.9291932 | 2.6576808  | 1.5392593  |
| H  | 13.5302036 | 1.8968566  | 2.0334538  |
| C  | 7.8325912  | 8.9668579  | -2.0305742 |
| C  | 6.3415555  | 9.0616470  | 4.8363653  |
| H  | 5.5997973  | 9.6951285  | 4.3573246  |
| C  | 6.7147100  | 9.6208391  | 0.6031959  |
| H  | 6.2828366  | 10.2396387 | -0.1804876 |
| C  | 8.3025562  | 7.4270738  | 6.0240182  |
| C  | 6.4235242  | 9.6447653  | 1.9465146  |
| H  | 5.7185056  | 10.3042598 | 2.4441374  |
| C  | 8.2768085  | 8.2363040  | -0.8081633 |
| C  | 12.0949150 | 3.2884407  | 3.8559098  |
| C  | 7.3623865  | 8.1305103  | 6.7691084  |
| H  | 7.4118590  | 8.0615489  | 7.8540142  |
| C  | 6.3455496  | 8.9390814  | 6.2137647  |
| C  | 5.3377996  | 9.6455377  | 7.1363093  |
| C  | 12.9661652 | 2.7010429  | 0.1272921  |
| C  | 7.2688752  | 8.3806195  | 4.0079245  |
| C  | 8.2793980  | 10.2660246 | -2.2976121 |
| F  | 9.1194241  | 10.8696609 | -1.4552776 |
| C  | 13.7581493 | 1.9148274  | -2.1689078 |
| H  | 12.7320359 | 1.7612486  | -2.5395149 |
| H  | 14.4089346 | 1.1920763  | -2.6867121 |
| H  | 14.0827586 | 2.9253247  | -2.4645502 |
| C  | 6.9565782  | 8.3780140  | -2.9497951 |

|   |            |            |            |
|---|------------|------------|------------|
| F | 6.4980697  | 7.1439316  | -2.7375552 |
| C | 9.4223851  | 6.6385399  | 6.7303921  |
| C | 13.8515753 | 1.7093792  | -0.6465150 |
| C | 7.8710549  | 10.9629960 | -3.4377098 |
| F | 8.3115891  | 12.1959819 | -3.6720709 |
| C | 4.3046174  | 10.4670187 | 6.3449574  |
| H | 4.7830209  | 11.2638892 | 5.7534071  |
| H | 3.5968130  | 10.9493367 | 7.0380445  |
| H | 3.7195084  | 9.8338230  | 5.6589574  |
| C | 6.9947265  | 10.3520174 | -4.3399199 |
| F | 6.5998635  | 11.0043834 | -5.4268880 |
| C | 15.3262954 | 1.9006377  | -0.2235365 |
| H | 15.6662757 | 2.9252854  | -0.4443987 |
| H | 15.9807420 | 1.1962980  | -0.7644750 |
| H | 15.4685721 | 1.7263497  | 0.8543291  |
| C | 12.4446399 | 4.5856027  | 4.6155869  |
| H | 13.4671558 | 4.9117627  | 4.3610626  |
| H | 12.4030618 | 4.4187109  | 5.7039169  |
| H | 11.7483613 | 5.3880580  | 4.3605276  |
| C | 10.6627953 | 2.8098599  | 4.1913945  |
| H | 9.9187534  | 3.5425511  | 3.8565853  |
| H | 10.5359416 | 2.6651743  | 5.2757984  |
| H | 10.4570807 | 1.8506160  | 3.6891180  |
| C | 10.7882870 | 7.2398317  | 6.3235998  |
| H | 10.9298048 | 7.1915262  | 5.2377844  |
| H | 11.6162288 | 6.6846720  | 6.7929143  |
| H | 10.8548086 | 8.2933533  | 6.6403722  |
| C | 6.5323770  | 9.0550037  | -4.0962910 |
| F | 5.6951774  | 8.4775389  | -4.9534672 |
| C | 13.0691171 | 2.1989670  | 4.3464463  |
| H | 12.8537857 | 1.2117795  | 3.9082117  |
| H | 12.9770477 | 2.0970162  | 5.4396091  |
| H | 14.1175936 | 2.4547899  | 4.1240899  |
| C | 13.4109247 | 0.2622872  | -0.3270991 |
| H | 13.4945929 | 0.0369843  | 0.7473820  |
| H | 14.0388850 | -0.4644404 | -0.8697613 |
| H | 12.3620777 | 0.0985550  | -0.6230965 |
| C | 6.0906058  | 10.6046175 | 8.0870918  |
| H | 6.8205251  | 10.0694762 | 8.7141469  |
| H | 5.3845235  | 11.1176858 | 8.7618919  |
| H | 6.6382134  | 11.3713046 | 7.5155496  |
| C | 4.5769175  | 8.5901407  | 7.9713564  |
| H | 4.0275250  | 7.8952465  | 7.3159126  |
| H | 3.8501041  | 9.0762321  | 8.6440826  |
| H | 5.2597064  | 7.9924440  | 8.5950360  |
| C | 9.3464137  | 5.1486896  | 6.3444398  |
| H | 8.3760810  | 4.7218890  | 6.6484894  |
| H | 10.1424231 | 4.5762081  | 6.8471058  |
| H | 9.4628689  | 5.0256369  | 5.2653620  |
| C | 9.3300825  | 6.7238561  | 8.2667260  |
| H | 9.4088828  | 7.7592488  | 8.6345763  |
| H | 10.1606886 | 6.1525392  | 8.7112968  |

|   |            |            |            |
|---|------------|------------|------------|
| H | 8.3918419  | 6.2912939  | 8.6490616  |
| H | 5.9823512  | 5.2969952  | 3.4506318  |
| C | 6.7702364  | 4.7523460  | 1.4833195  |
| C | 6.6053620  | 5.1618991  | 0.0175091  |
| H | 5.6110961  | 4.8620605  | -0.3469643 |
| H | 6.6992633  | 6.2462320  | -0.1052999 |
| H | 7.3632990  | 4.6815582  | -0.6217978 |
| C | 6.5350852  | 3.2372930  | 1.6406211  |
| H | 7.2250214  | 2.6593533  | 1.0027142  |
| H | 5.5065004  | 2.9743874  | 1.3487844  |
| H | 6.6840931  | 2.9186192  | 2.6858187  |
| C | 5.8036172  | 5.5242030  | 2.3867031  |
| H | 5.9068737  | 6.6064193  | 2.2503485  |
| N | 10.6584767 | 8.1403879  | 2.4088276  |
| H | 13.7973966 | 8.0304720  | 1.0464844  |
| H | 13.1153948 | 7.0473781  | 2.3716054  |
| C | 11.8616394 | 8.7200421  | 1.7314494  |
| C | 11.4349799 | 9.4205260  | 0.4385827  |
| H | 12.2910614 | 9.9603994  | 0.0062054  |
| H | 11.0739226 | 8.7013183  | -0.3055412 |
| H | 10.6307124 | 10.1513165 | 0.6198120  |
| C | 12.4743826 | 9.7443354  | 2.7069024  |
| H | 11.7638739 | 10.5585123 | 2.9283756  |
| H | 13.3792635 | 10.1962709 | 2.2720054  |
| H | 12.7580204 | 9.2650533  | 3.6587764  |
| C | 12.8687044 | 7.6012695  | 1.4522835  |
| H | 12.4756116 | 6.8832931  | 0.7244953  |
| H | 10.9570454 | 7.7193370  | 3.2927942  |
| H | 10.0386357 | 8.9098195  | 2.6765321  |
| H | 8.7878500  | 4.3612525  | 1.4304870  |
| H | 8.2699143  | 4.7949864  | 2.9120928  |

**[Co<sup>II</sup>(DPP<sup>2-</sup>)]•CH<sub>2</sub>Cl<sub>2</sub> (BSS/OSS)**

102 atoms

|    |            |           |            |
|----|------------|-----------|------------|
| Co | 9.5219335  | 6.5032256 | 1.7428936  |
| O  | 10.6415705 | 5.0420587 | 2.1963262  |
| O  | 9.2300515  | 6.6781871 | 3.6120738  |
| N  | 8.1867148  | 7.8363146 | 1.4008343  |
| C  | 10.9616057 | 5.5033709 | -0.6134639 |
| N  | 9.9999211  | 6.3290570 | -0.1067245 |
| C  | 7.8790569  | 8.3853074 | 0.1733221  |
| H  | 9.0661344  | 6.7789265 | 8.4941353  |
| H  | 10.8314041 | 6.6900757 | 8.3549090  |
| C  | 11.4018753 | 4.2622670 | 1.5131464  |
| C  | 7.3091684  | 8.3583100 | 2.3122385  |
| C  | 9.5965525  | 7.1672233 | -1.1267249 |
| C  | 11.6305754 | 4.4610566 | 0.0988729  |
| C  | 10.3502477 | 6.8677007 | -2.3188793 |
| H  | 10.2506798 | 7.3756786 | -3.2753008 |
| C  | 8.4461911  | 7.4077905 | 4.3184512  |
| C  | 12.5210522 | 3.5978937 | -0.6014980 |
| H  | 12.6745808 | 3.7727800 | -1.6627687 |



|   |            |            |            |
|---|------------|------------|------------|
| H | 12.8212226 | 3.8487773  | -1.5953975 |
| C | 12.1066139 | 3.1453518  | 2.2006825  |
| C | 11.3277655 | 5.9104576  | -1.9445453 |
| H | 12.0441887 | 5.4315919  | -2.6061092 |
| C | 12.9490008 | 2.3563941  | 1.4451945  |
| H | 13.4184104 | 1.4987363  | 1.9234555  |
| C | 8.3509161  | 8.9875397  | -2.1611133 |
| C | 6.5480899  | 8.8856482  | 4.6161087  |
| H | 5.7266587  | 9.4172723  | 4.1429878  |
| C | 6.8404411  | 9.2825722  | 0.3550981  |
| H | 6.3600850  | 9.8260060  | -0.4555428 |
| C | 8.7361883  | 7.5275025  | 5.8169774  |
| C | 6.4793661  | 9.2588579  | 1.6753685  |
| H | 5.6557327  | 9.8004160  | 2.1323551  |
| C | 8.7065567  | 8.1814510  | -0.9603910 |
| C | 11.8336575 | 2.8434710  | 3.6831373  |
| C | 7.7966504  | 8.2217714  | 6.5489700  |
| H | 7.9145953  | 8.2644963  | 7.6300530  |
| C | 6.6682512  | 8.8944041  | 5.9879919  |
| C | 5.6817021  | 9.6103325  | 6.9228497  |
| C | 13.2555433 | 2.5853420  | 0.0699518  |
| C | 7.4888413  | 8.2232176  | 3.7788872  |
| C | 8.5920125  | 10.3681912 | -2.1838711 |
| F | 9.1643772  | 10.9602396 | -1.1321098 |
| C | 14.4423916 | 2.0339586  | -2.1216490 |
| H | 13.5018250 | 1.9898902  | -2.6936367 |
| H | 15.1521359 | 1.3385601  | -2.5972700 |
| H | 14.8581669 | 3.0496185  | -2.2185797 |
| C | 7.7610561  | 8.4164723  | -3.2966192 |
| F | 7.5099785  | 7.1099775  | -3.3358130 |
| C | 9.9209878  | 6.8194681  | 6.4925437  |
| C | 14.2329228 | 1.6419803  | -0.6483569 |
| C | 8.2602916  | 11.1589334 | -3.2857549 |
| F | 8.5057156  | 12.4658357 | -3.2819357 |
| C | 4.5272657  | 10.2741357 | 6.1520067  |
| H | 4.8914238  | 11.0449725 | 5.4542675  |
| H | 3.8395116  | 10.7660614 | 6.8579404  |
| H | 3.9432776  | 9.5371046  | 5.5779794  |
| C | 7.6693491  | 10.5625669 | -4.4042000 |
| F | 7.3481889  | 11.3019600 | -5.4585810 |
| C | 15.6047024 | 1.6909229  | 0.0648078  |
| H | 16.0203527 | 2.7111531  | 0.0441503  |
| H | 16.3220769 | 1.0168613  | -0.4325884 |
| H | 15.5320939 | 1.3796786  | 1.1183961  |
| C | 12.4072731 | 3.9968256  | 4.5380895  |
| H | 13.4909076 | 4.0972635  | 4.3618101  |
| H | 12.2564435 | 3.7917457  | 5.6094417  |
| H | 11.9248015 | 4.9501539  | 4.2985571  |
| C | 10.3118461 | 2.6776689  | 3.9118871  |
| H | 9.7623175  | 3.5795482  | 3.6199396  |
| H | 10.1058541 | 2.4761329  | 4.9754672  |
| H | 9.9266562  | 1.8292592  | 3.3226263  |

|    |            |            |            |
|----|------------|------------|------------|
| C  | 11.2536356 | 7.2943060  | 5.8637232  |
| H  | 11.2902948 | 7.0988188  | 4.7865194  |
| H  | 12.1013515 | 6.7763975  | 6.3413632  |
| H  | 11.3843309 | 8.3783953  | 6.0145828  |
| C  | 7.4196441  | 9.1870824  | -4.4119131 |
| F  | 6.8563166  | 8.6227508  | -5.4758714 |
| C  | 12.5112793 | 1.5389097  | 4.1448626  |
| H  | 12.1624694 | 0.6649638  | 3.5711770  |
| H  | 12.2668811 | 1.3587305  | 5.2036696  |
| H  | 13.6092396 | 1.5889649  | 4.0672395  |
| C  | 13.6824405 | 0.1973738  | -0.6057603 |
| H  | 13.5514134 | -0.1634328 | 0.4260982  |
| H  | 14.3756520 | -0.4939192 | -1.1135771 |
| H  | 12.7046835 | 0.1359335  | -1.1099341 |
| C  | 6.4303868  | 10.7091397 | 7.7132242  |
| H  | 7.2458346  | 10.2936304 | 8.3250866  |
| H  | 5.7386434  | 11.2337250 | 8.3934173  |
| H  | 6.8695857  | 11.4525569 | 7.0288578  |
| C  | 5.0773808  | 8.5864095  | 7.9117885  |
| H  | 4.5344860  | 7.7938133  | 7.3721931  |
| H  | 4.3697400  | 9.0832505  | 8.5964641  |
| H  | 5.8513176  | 8.1030773  | 8.5275667  |
| C  | 9.7374647  | 5.2955046  | 6.3231269  |
| H  | 8.7924634  | 4.9697412  | 6.7884431  |
| H  | 10.5613705 | 4.7514504  | 6.8108392  |
| H  | 9.7185848  | 5.0174823  | 5.2653024  |
| C  | 9.9923979  | 7.1199707  | 8.0021438  |
| H  | 10.1015406 | 8.1978812  | 8.2043261  |
| H  | 10.3264218 | 9.6272528  | 0.9927226  |
| C  | 11.0776202 | 9.8093916  | 1.7689803  |
| H  | 11.7815255 | 10.5950195 | 1.4711866  |
| Cl | 10.2401560 | 10.3316590 | 3.2540017  |
| Cl | 12.0177853 | 8.2944300  | 1.9864568  |
| H  | 5.3374865  | 4.7376203  | 1.0714992  |
| C  | 6.2636692  | 5.3059461  | 0.9263033  |
| H  | 6.1499642  | 6.3503985  | 1.2370635  |
| Cl | 6.6822081  | 5.2790454  | -0.8063593 |
| Cl | 7.5188991  | 4.5622627  | 1.9722501  |

#### THF (CSS)

13 atoms

|   |            |            |            |
|---|------------|------------|------------|
| O | 0.0000840  | -1.2489620 | 0.0000402  |
| C | -1.1615662 | -0.4366997 | 0.1381694  |
| C | -0.7316401 | 0.9881237  | -0.2306953 |
| C | 0.7315552  | 0.9882179  | 0.2306570  |
| C | 1.1616419  | -0.4365757 | -0.1381353 |
| H | -1.5296611 | -0.4790003 | 1.1836927  |
| H | -1.9613562 | -0.8298851 | -0.5132232 |
| H | -0.7870229 | 1.1362654  | -1.3227522 |
| H | -1.3491143 | 1.7632406  | 0.2485656  |
| H | 0.7869212  | 1.1364205  | 1.3227065  |
| H | 1.3489420  | 1.7633802  | -0.2486430 |

|   |           |            |            |
|---|-----------|------------|------------|
| H | 1.9614782 | -0.8296369 | 0.5132752  |
| H | 1.5297383 | -0.4788886 | -1.1836576 |

**Pyridine (Py) (CSS)**

11 atoms

|   |            |           |            |
|---|------------|-----------|------------|
| H | 2.1660057  | 0.0000000 | -1.1849204 |
| C | 1.2006924  | 0.0000000 | -0.6723427 |
| C | -1.1432790 | 0.0000000 | 0.7266375  |
| C | 1.1432790  | 0.0000000 | 0.7266375  |
| C | 0.0000000  | 0.0000000 | -1.3868794 |
| C | -1.2006924 | 0.0000000 | -0.6723427 |
| N | -0.0000000 | 0.0000000 | 1.4182010  |
| H | 2.0698592  | 0.0000000 | 1.3142228  |
| H | 0.0000000  | 0.0000000 | -2.4805160 |
| H | -2.1660057 | 0.0000000 | -1.1849204 |
| H | -2.0698593 | 0.0000000 | 1.3142228  |

***t*BuNH<sub>2</sub> (CSS)**

16 atoms

|   |           |           |           |
|---|-----------|-----------|-----------|
| N | 1.0039775 | 1.8495204 | 5.3308355 |
| H | 3.4919014 | 2.6902035 | 4.6739121 |
| C | 1.3361844 | 2.9477220 | 4.4076059 |

|   |            |           |           |
|---|------------|-----------|-----------|
| C | 0.3149601  | 2.9134825 | 3.2601133 |
| H | 0.5326840  | 3.6912676 | 2.5106400 |
| H | 0.3282208  | 1.9301442 | 2.7654023 |
| H | -0.7066897 | 3.0897058 | 3.6389428 |
| C | 1.2972133  | 4.3275429 | 5.0986141 |
| H | 0.2927068  | 4.5287476 | 5.5086025 |
| H | 1.5470939  | 5.1451646 | 4.4013606 |
| H | 2.0171466  | 4.3644855 | 5.9340263 |
| C | 2.7468095  | 2.6819240 | 3.8596094 |
| H | 2.7883631  | 1.6958093 | 3.3720250 |
| H | 3.0411729  | 3.4523322 | 3.1289891 |
| H | 0.0771458  | 2.0040919 | 5.7330007 |
| H | 1.6531096  | 1.8528558 | 6.1203202 |

**CH<sub>2</sub>Cl<sub>2</sub> (CSS)**

5 atoms

|    |            |            |            |
|----|------------|------------|------------|
| C  | -0.0059755 | 0.0104918  | 1.0813620  |
| H  | 1.0301901  | 0.0218903  | 1.4405970  |
| H  | -0.5343887 | -0.8809126 | 1.4405193  |
| Cl | 0.0266973  | -0.0459889 | -0.7064267 |
| Cl | -0.8375231 | 1.4515193  | 1.7389484  |



## References in the Supporting Information

- 1 Bruker, *APEX2 software*, Madison WI, USA, **2014**.
- 2 G. M. Sheldrick, *SADABS*, University of Göttingen, Germany, **2008**.
- 3 Sheldrick, G. M. Crystal structure refinement with *SHELXL*. *Acta Cryst. C* **2015**, *71*, 3-8.
- 4 G. M. Sheldrick, *SHELXL2013*, University of Göttingen, Germany, **2013**.
- 5 Macrae, C. F.; Sovago, I.; Cottrell, S. J.; Galek, P. T. A.; McCabe, P.; Pidcock, E.; Platings, M.; Shields, G. P.; Stevens, J. S.; Towler, M.; Wood, P. A. *J. Appl. Cryst.* **2020**, *53*, 226–235.
- 6 Spek, A. L. *Acta Cryst.* **2009**, *D65*, 148–155.
- 7 (a) Evans, D. F. *J. Chem. Soc.* **1959**, 2003–2005. (b) Deutsch, J. L.; Poling, S. M. *J. Chem. Educ.* **1969**, *46*, 167–168. (c) Piguet, C. *J. Chem. Educ.* **1997**, *74*, 815–816. (d) Sur, S. K. *J. Magn. Reson.* **1989**, *82*, 169–173. (e) Grant, D. H. *J. Chem. Educ.* **1995**, *72*, 39. (f) Hoppeé, J. I. Effective magnetic moment. *J. Chem. Educ.* **1972**, *49*, 505. (g) Bain, G. A.; Berry, J. F. *J. Chem. Educ.* **2008**, *85*, 532–536.
- 8 TURBOMOLE *Version 7.3*; TURBOMOLE GmbH, Karlsruhe, Germany, **2018**.
- 9 (a) *PQS Version 2.4*; Parallel Quantum Solutions, Fayetteville, AR, USA, **2001**. (b) Baker, J. *J. Comput. Chem.* **1986**, *7*, 385–395.
- 10 Budzelaar, P. H. M. *J. Comput. Chem.* **2007**, *28*, 2226–2236.
- 11 (a) van Leest, N. P.; Tepaske, M. A.; Oudsen, J.-P. H.; Venderbosch, B.; Rietdijk, N. R.; Siegler, M. A.; Tromp, M.; van der Vlugt, J. I.; de Bruin, B. *J. Am. Chem. Soc.* **2020**, *142*, 552–563. (b) van Leest, N. P.; Tepaske, M. A.; Venderbosch, B.; Oudsen, J.-P. H.; Tromp, M.; van der Vlugt, J. I.; de Bruin, B. *ACS Catal.* **2020**, *10*, 7449–7463.
- 12 (a) Becke, A. D. *J. Chem. Phys.* **1993**, *98*, 5648–5652. (b) Lee, C. Yang, W. Parr, R. G. *Phys. Rev. B* **1988**, *37*, 785–789.
- 13 (a) Weigend, F.; Ahlrichs, R. *Phys. Chem. Chem. Phys.* **2005**, *7*, 3297–3305. (b) Weigend, F.; Haser, M.; Patzelt, H.; Ahlrichs, R. *Chem. Phys. Lett.* **1998**, *294*, 143–152.
- 14 Grimme, S.; Antony, J.; Ehrlich, S.; Krieg, H. *J. Chem. Phys.* **2010**, *132*, 154104–154119.
- 15 (a) Weigend, F.; Ahlrichs, R. *Phys. Chem. Chem. Phys.* **2005**, *7*, 3297–3305. (b) Weigend, F.; Haser, M.; Patzelt, H.; Ahlrichs, R. *Chem. Phys. Lett.* **1998**, *294*, 143–152.
- 16 Grimme, S.; Antony, J.; Ehrlich, S.; Krieg, H. *J. Chem. Phys.* **2010**, *132*, 154104–154119.
- 17 Neese, F. *Comput. Mol. Sci.* **2012**, *2*, 73–78.
- 18 Available at [www.iboview.org](http://www.iboview.org). (a) Knizia, G. *J. Chem. Theory Comput.* **2013**, *9*, 4834–4843. (b) Knizia, G.; Klein, J. E. M. N. *Angew. Chem. Int. Ed.* **2015**, *54*, 5118–5522.
- 19 Iszak, R.; Neese, F. *J. Chem. Phys.* **2011**, *135*, 144105–144111.
- 20 (a) Angeli, C.; Cimiraglia, R.; Evangelisti, S.; Leininger, T.; Malrieu, J.-P. *J. Chem. Phys.* **2001**, *114*, 10252–10264. (b) Angeli, C.; Cimiraglia, R.; Malrieu, J.-P. *Chem. Phys. Lett.* **2001**, *350*, 297–305. (c) Angeli, C.; Cimiraglia, R.; Malrieu, J.-P. *J. Chem. Phys.* **2002**, *117*, 9138–9153.
- 21 Rieth, R. D.; Mankad, N. P.; Calimano, E.; Sadighi, J. P. *Org. Lett.* **2004**, *6*, 3981–3983.
- 22 Nakano, K.; Kobayashi, K.; Nozaki, K. *J. Am. Chem. Soc.* **2011**, *133*, 10720–10723.
- 23 Ikeda, C.; Ueda, S.; Nabeshima, T. *Chem. Commun.* **2009**, 2544–2546.
- 24 Feng, Y.; Burns, L. A.; Lee, L.-C.; Sherril, C. D.; Jones, C. W.; Murdock, C. *Inorg. Chim. Acta* **2015**, *430*, 30–35.
- 25 Kochem, A.; Chiang, L.; Baptiste, B.; Philouze, C.; Leconte, N.; Jarjayes, O.; Storr, T.; Thomas, F. *Chem. Eur. J.* **2012**, *18*, 14590–14593.
- 26 (a) Noodleman, L.; Davidson, E. R. *Chem. Phys.* **1986**, *109*, 131–143. (b) Soda, Y.; Kitagawa, Y.; Onishi, T.; Takano, Y.; Shigeta, Y.; Nagoa, H.; Yoskioka, Y.; Yamaguchi, K. *Chem. Phys. Lett.* **2000**, *319*, 223–230.
